# Supplementary material for: Trends in global burden of diseases attributable to lead exposure in 204 countries and territories from 1990 to 2019
Source: PubMed Central journal article supplement (PMC9727290; doi:10.3389/fpubh.2022.1036398), 2022-11-23

**Figure 1** Association between age-standardized mortality rate (y axis) and SDI (x axis) at the country and territory level in 2019 by GBD Level 3 cause. SDI: sociodemographic

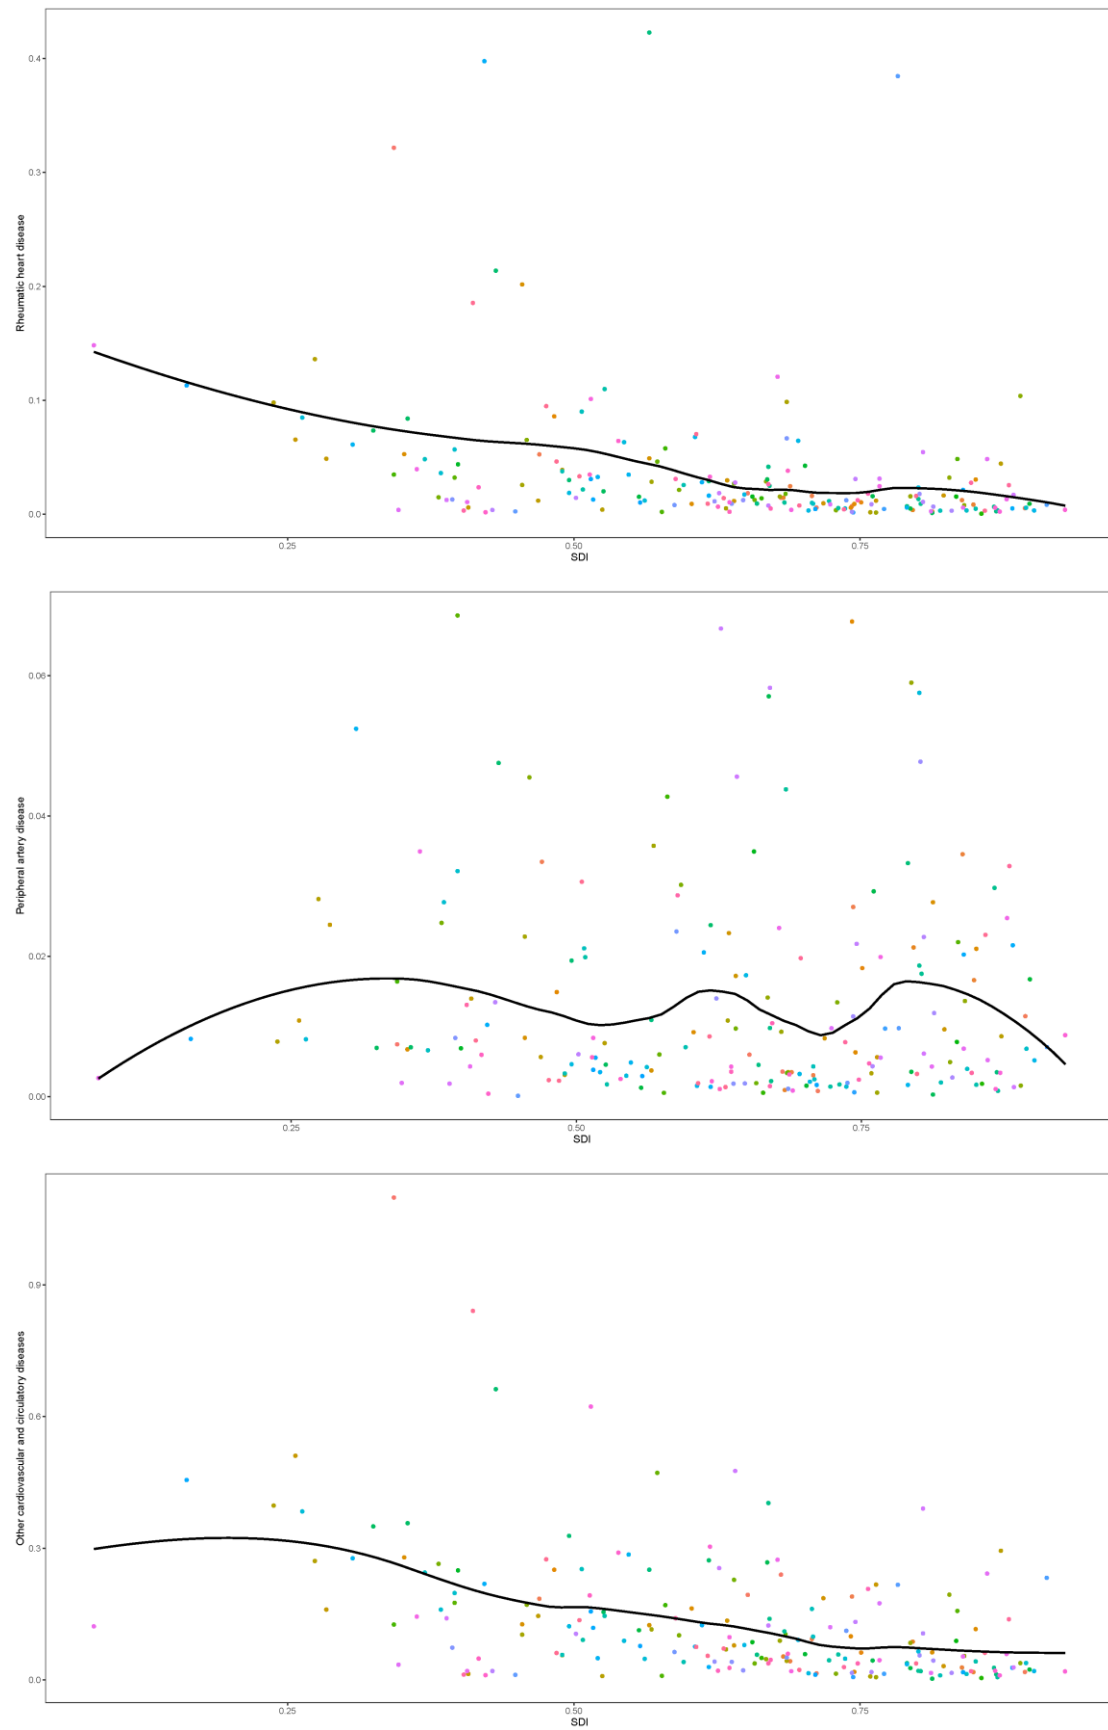

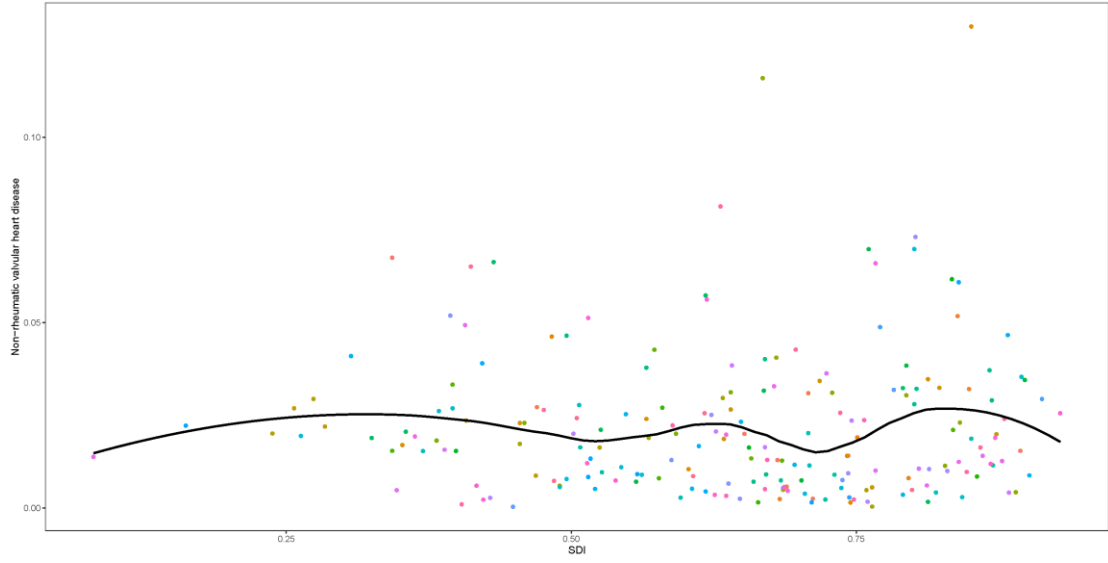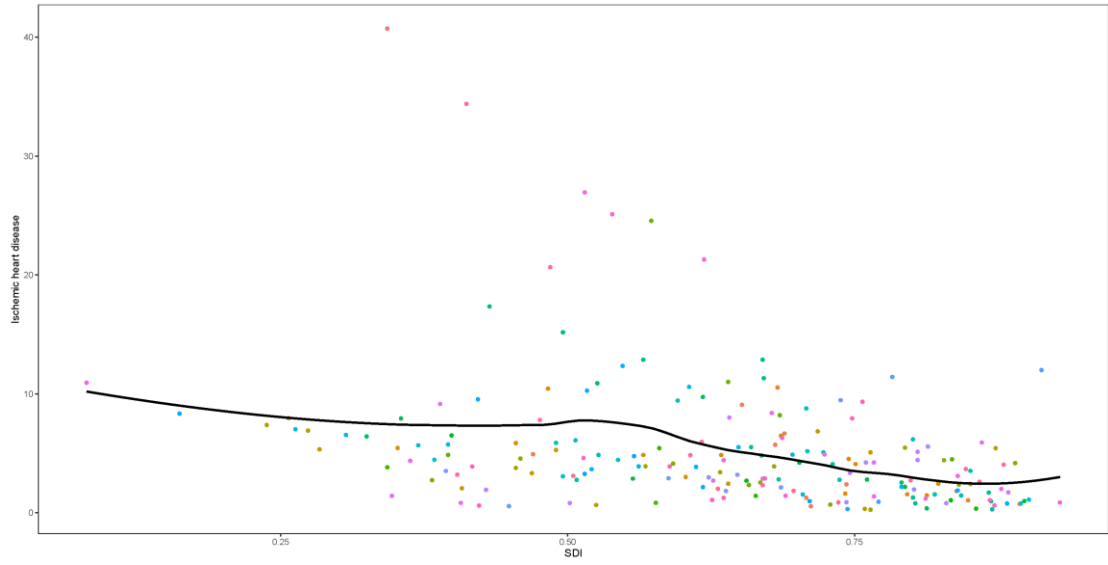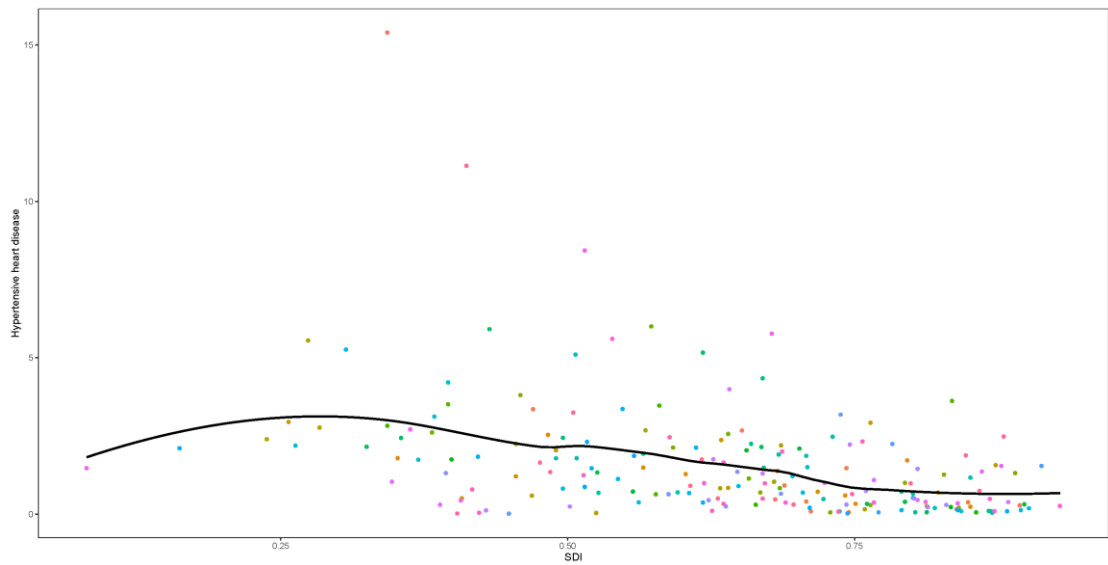

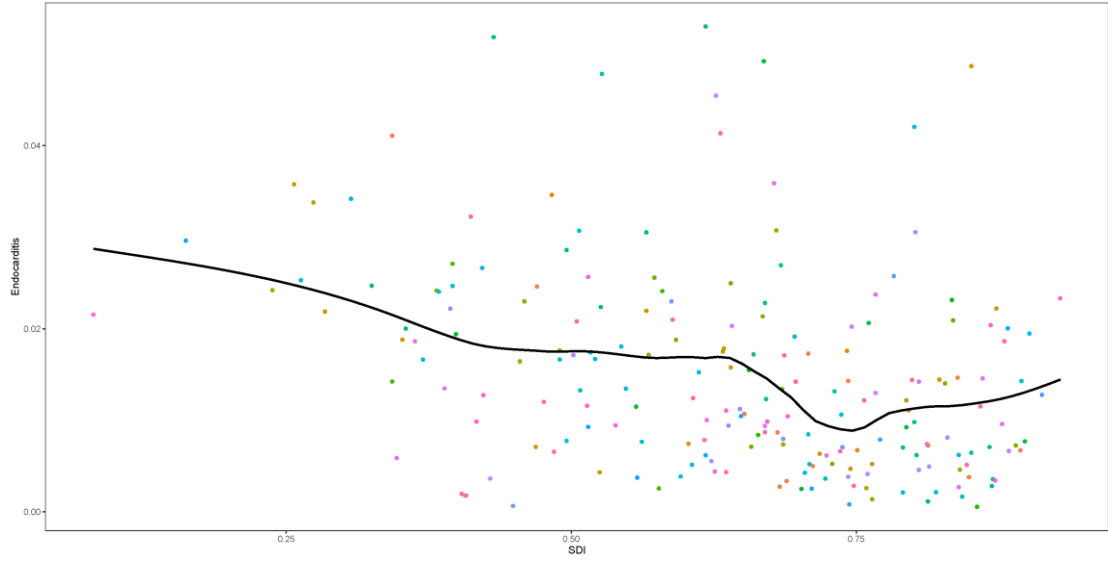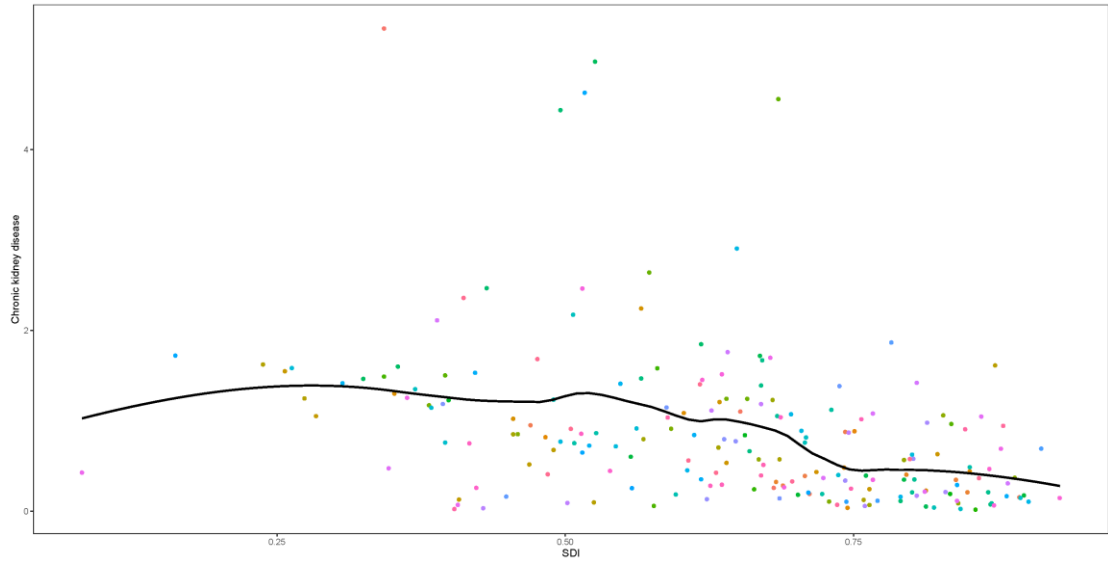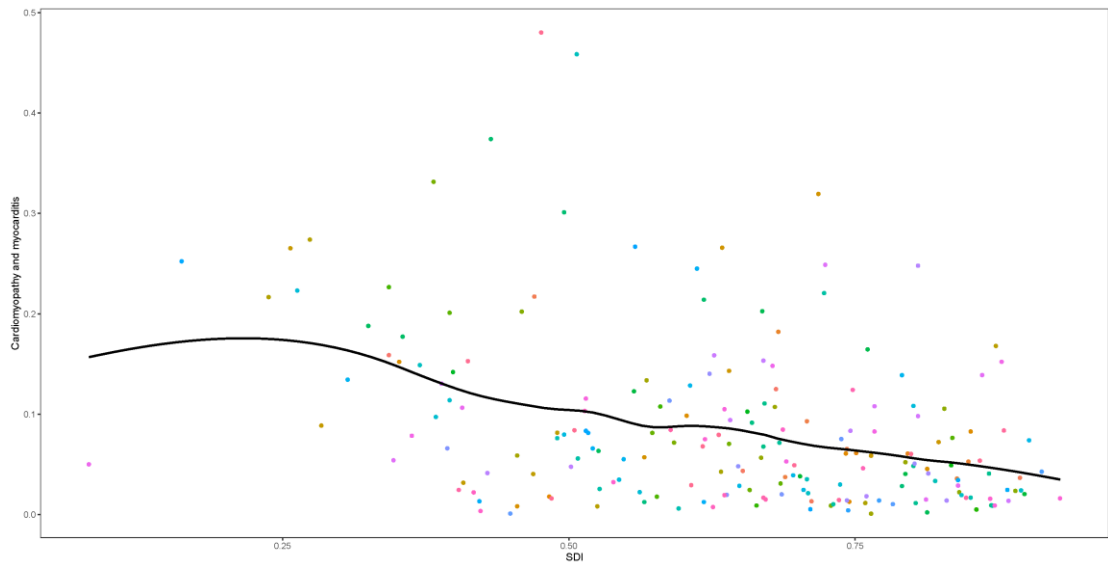

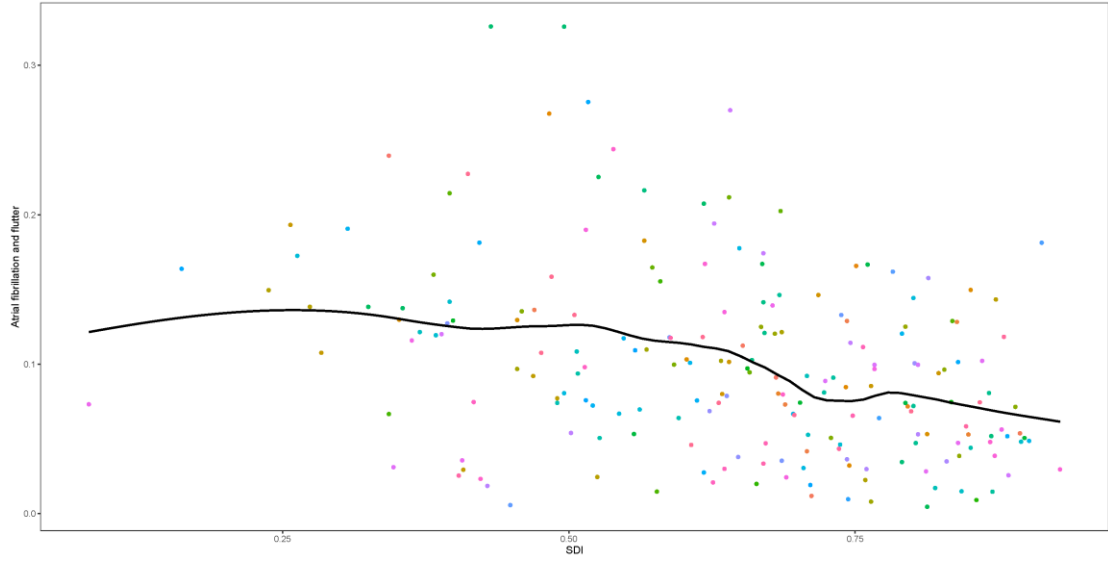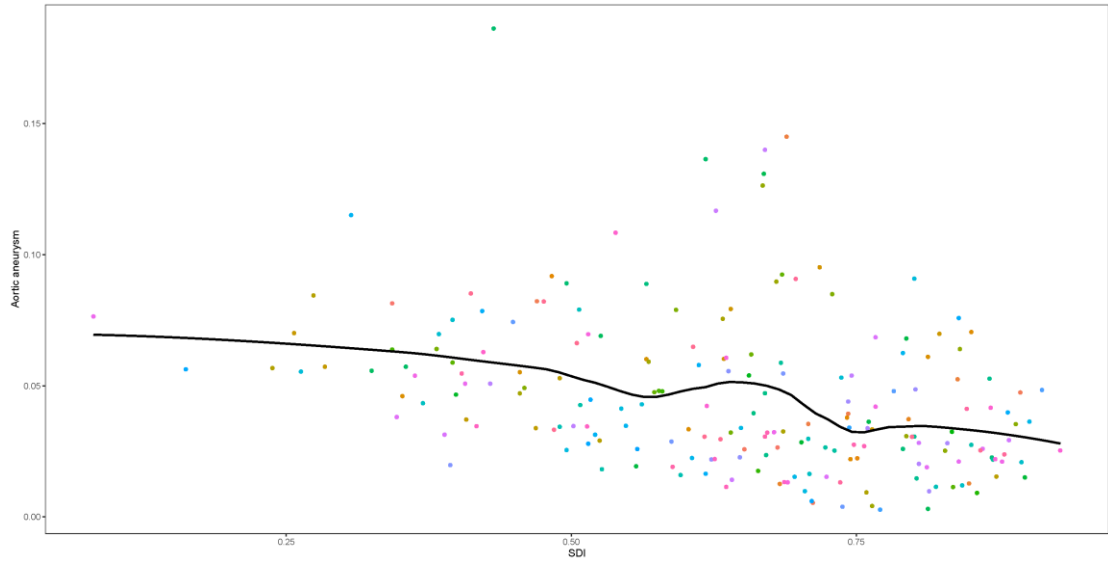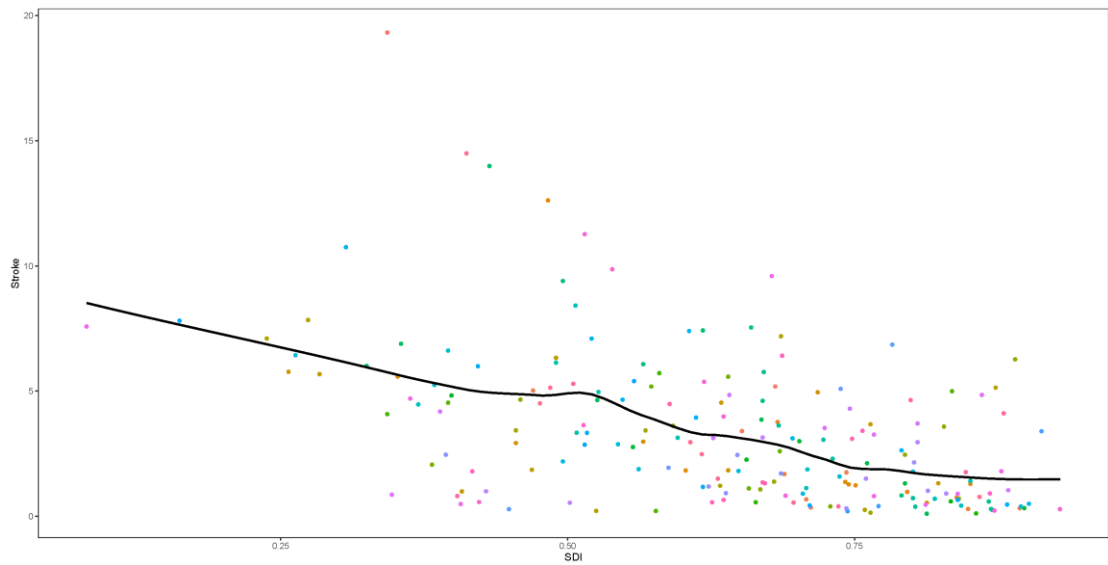

**Figure 2** Association between age-standardized disability-adjusted life year rate (y axis) and SDI (x axis) at the country and territory level in 2019 by GBD Level 3 cause. SDI: sociodemographic index.

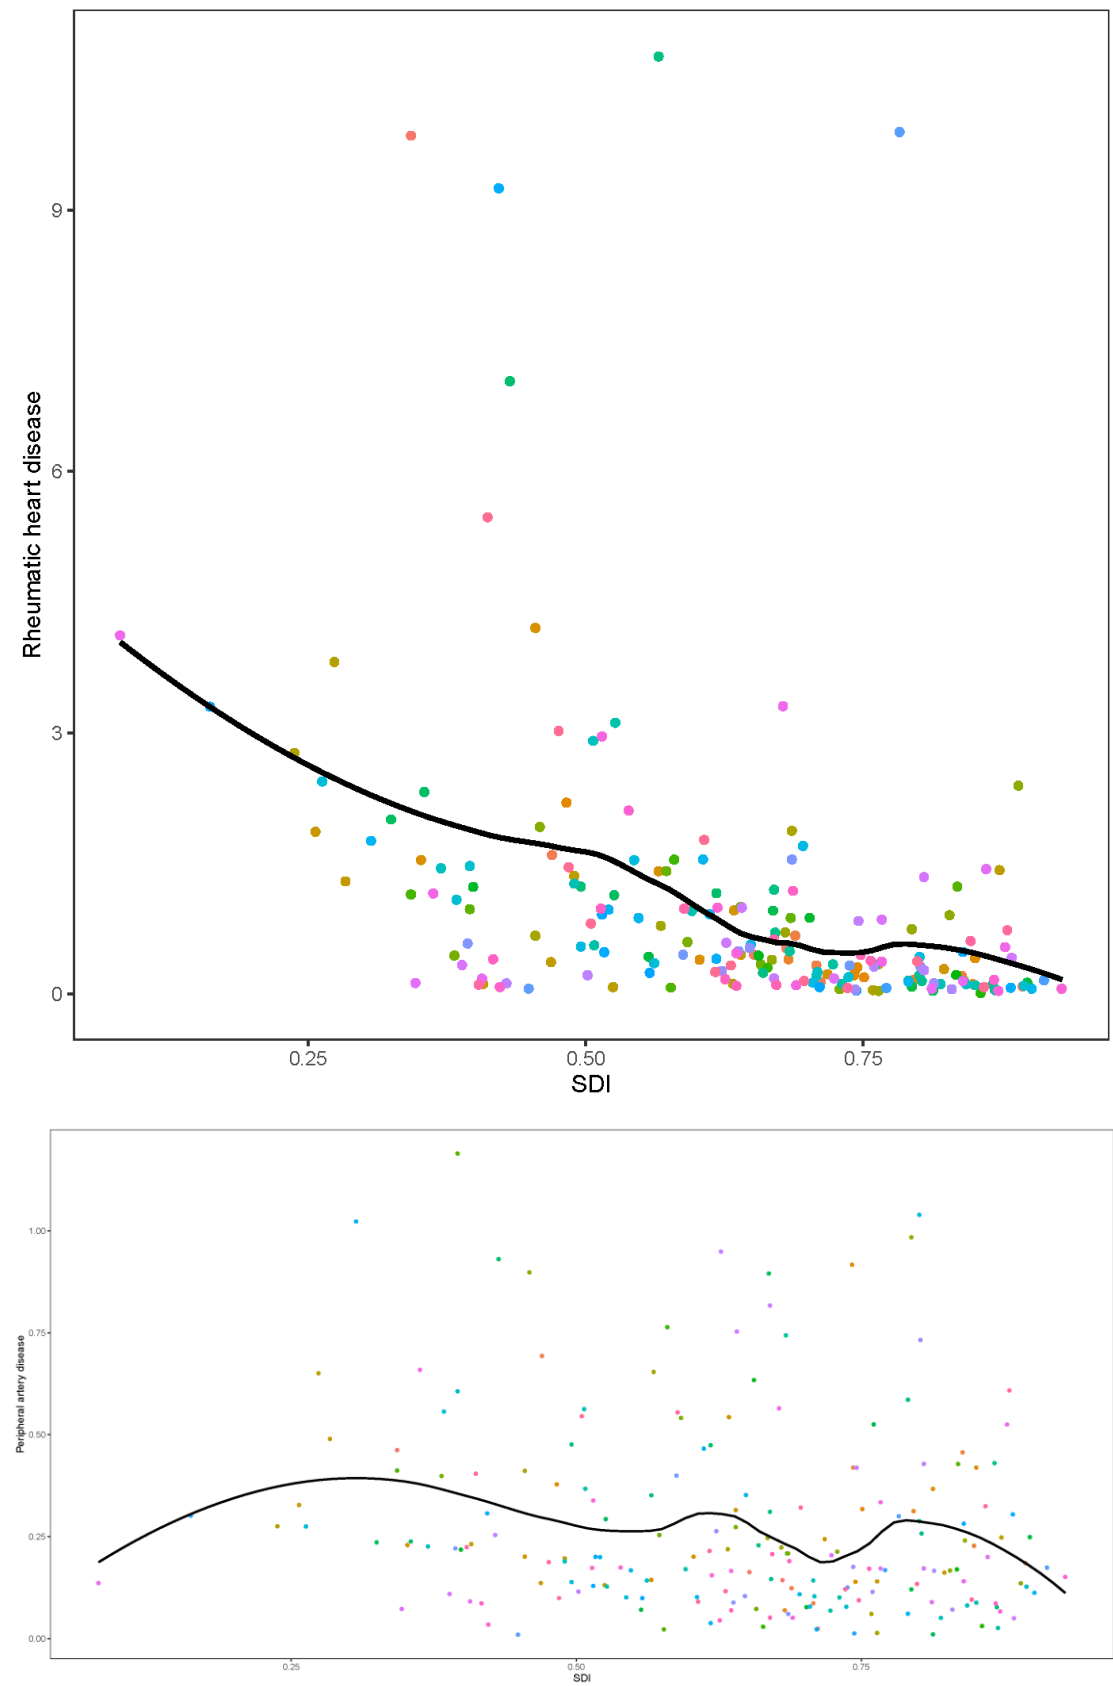

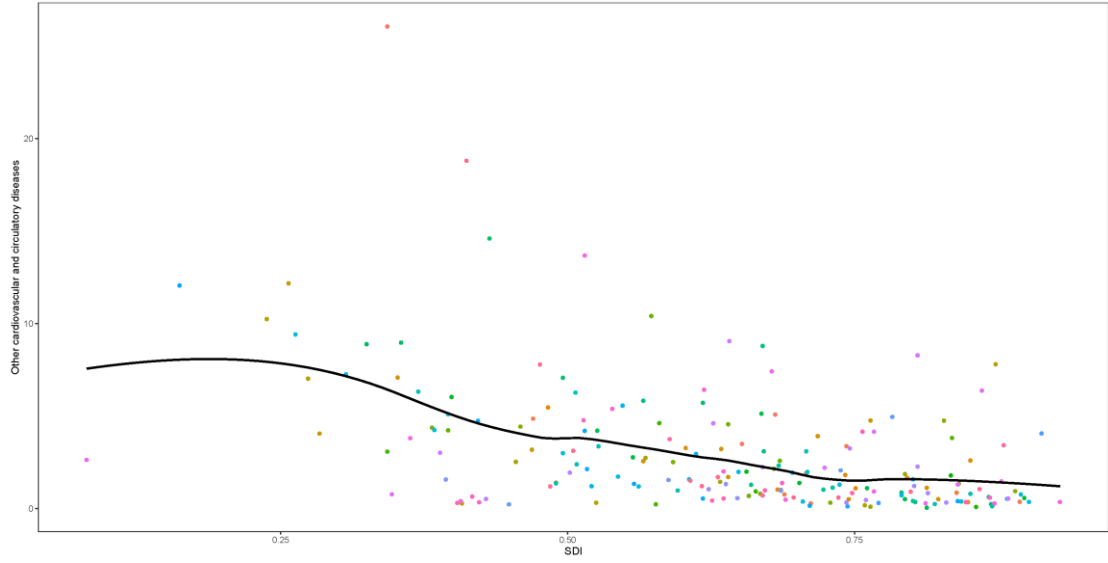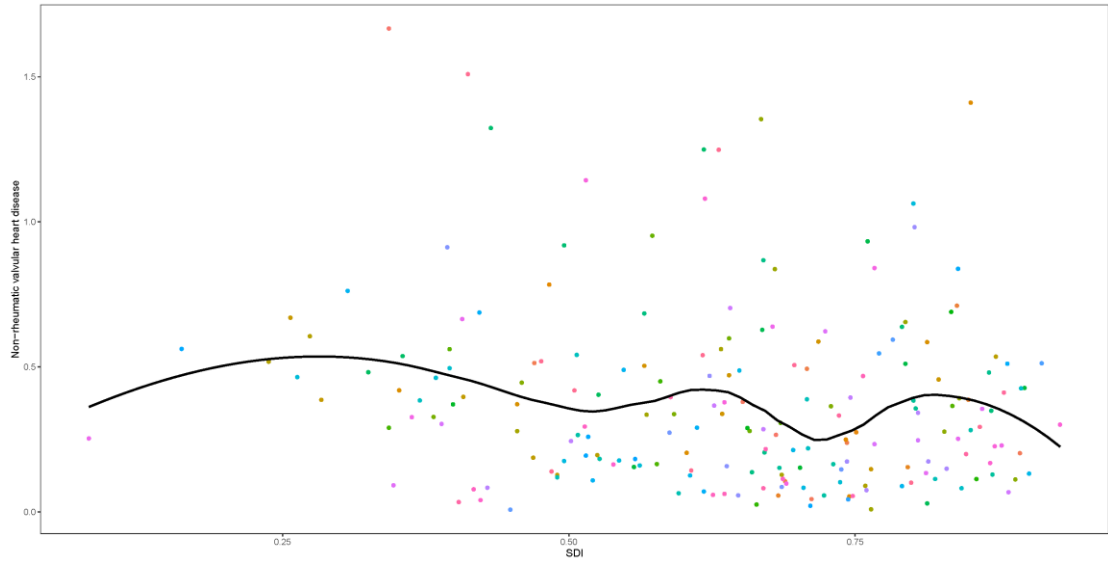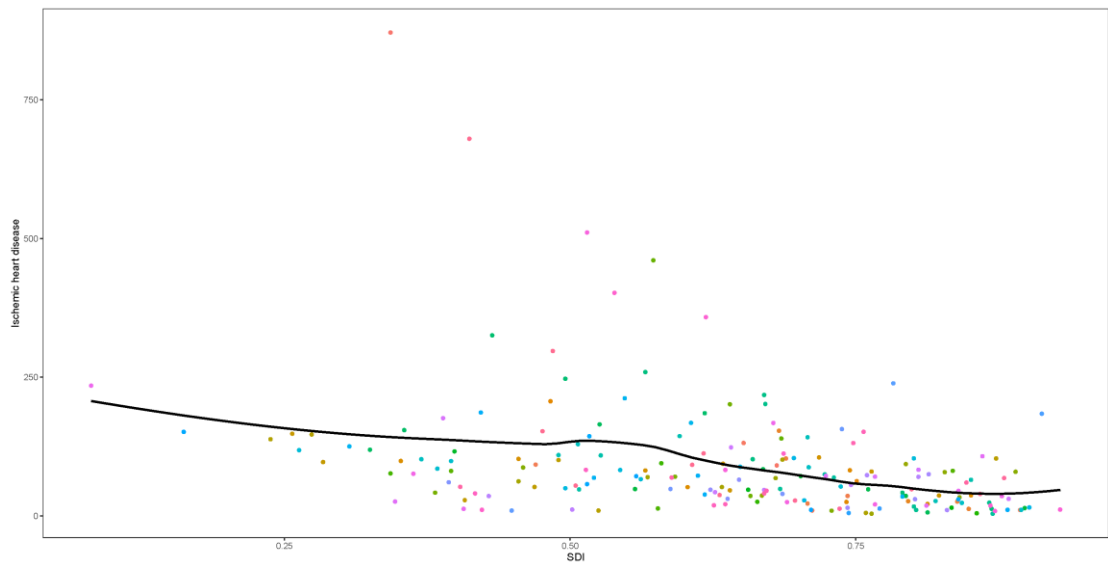

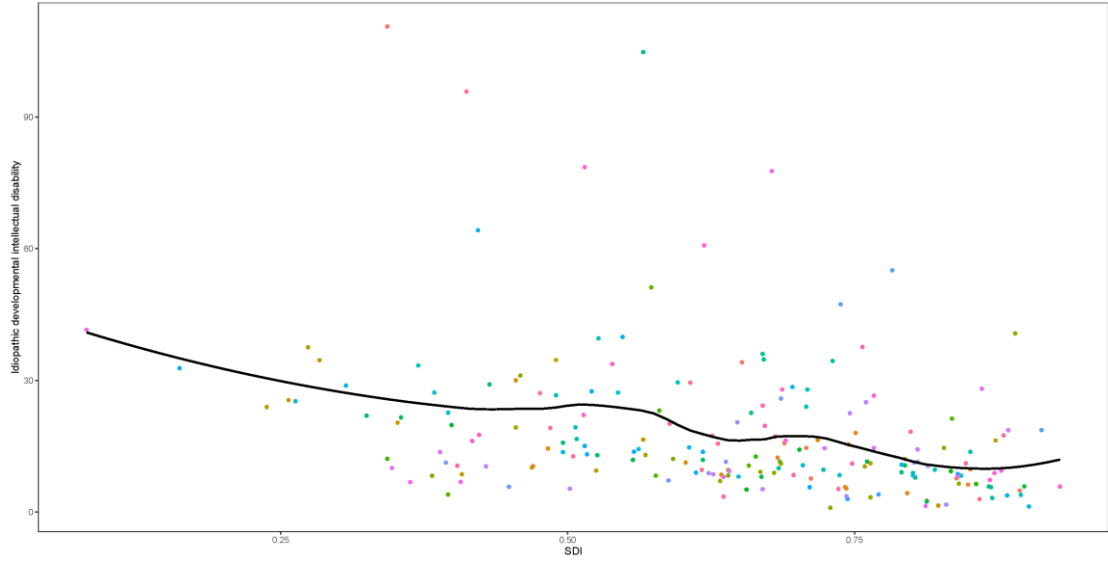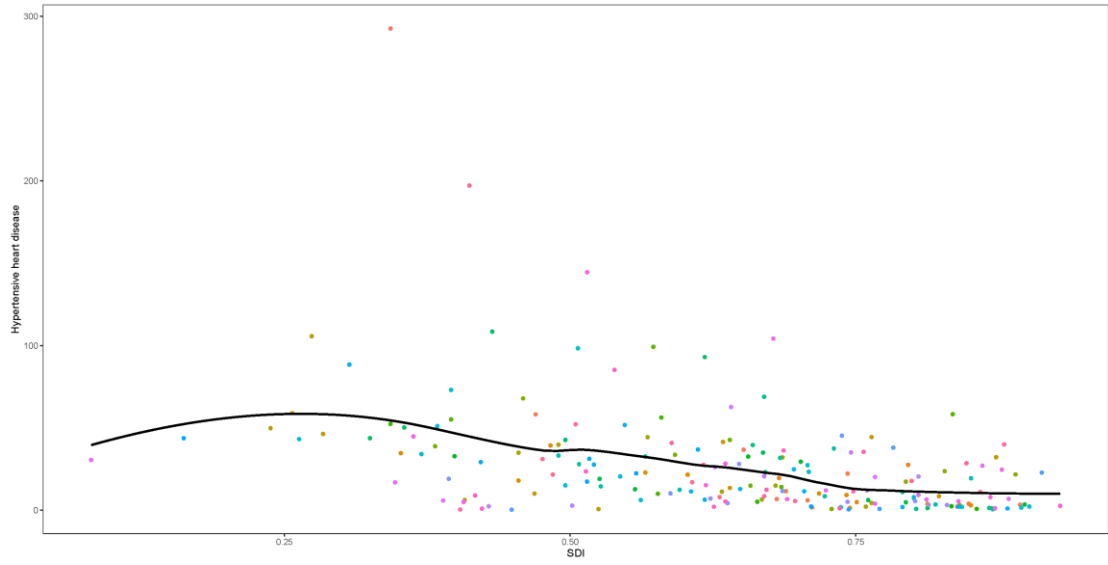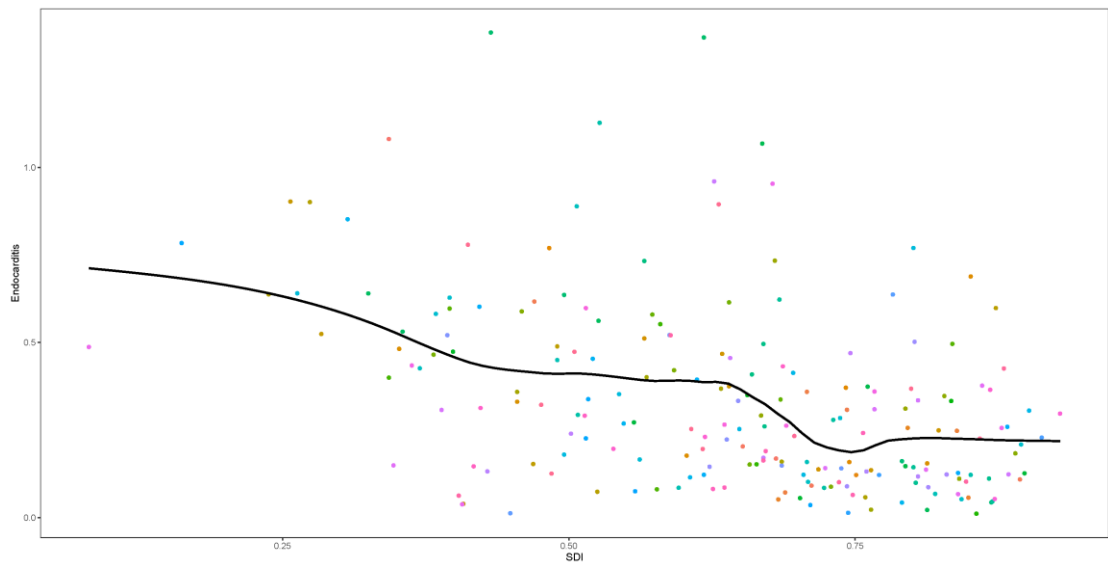

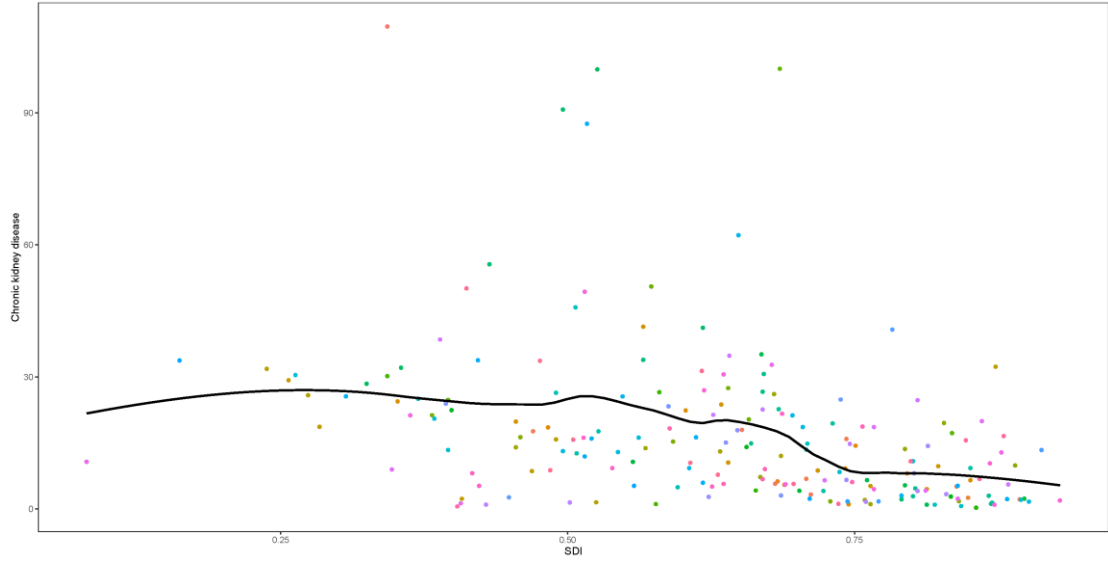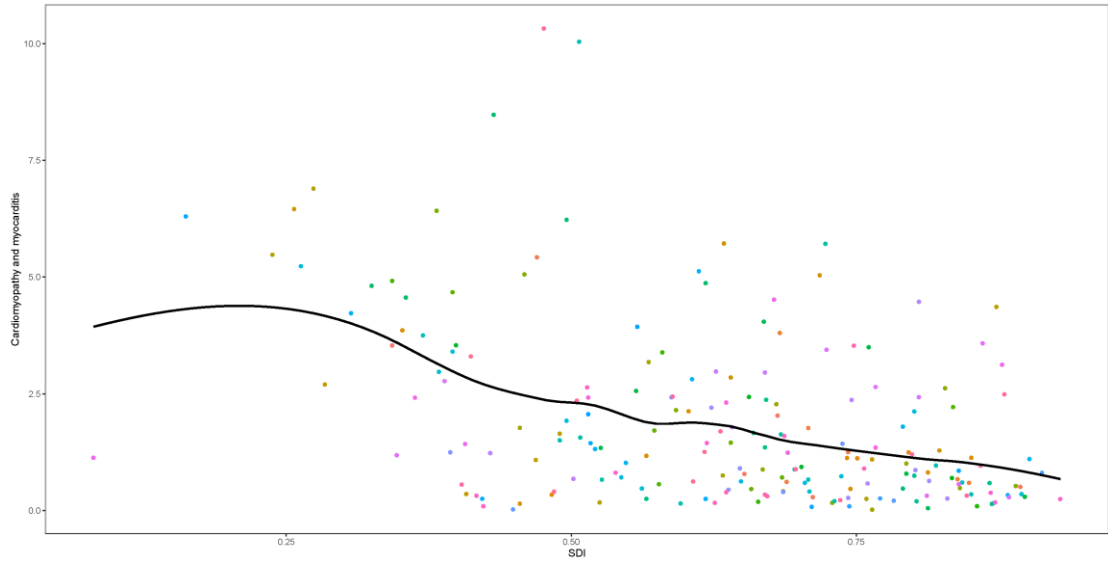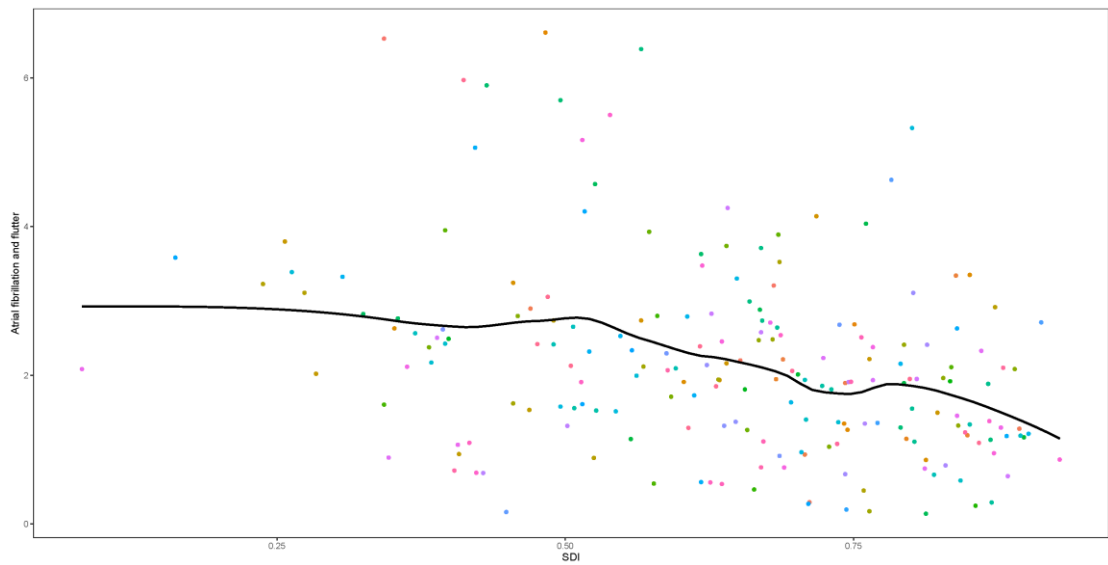



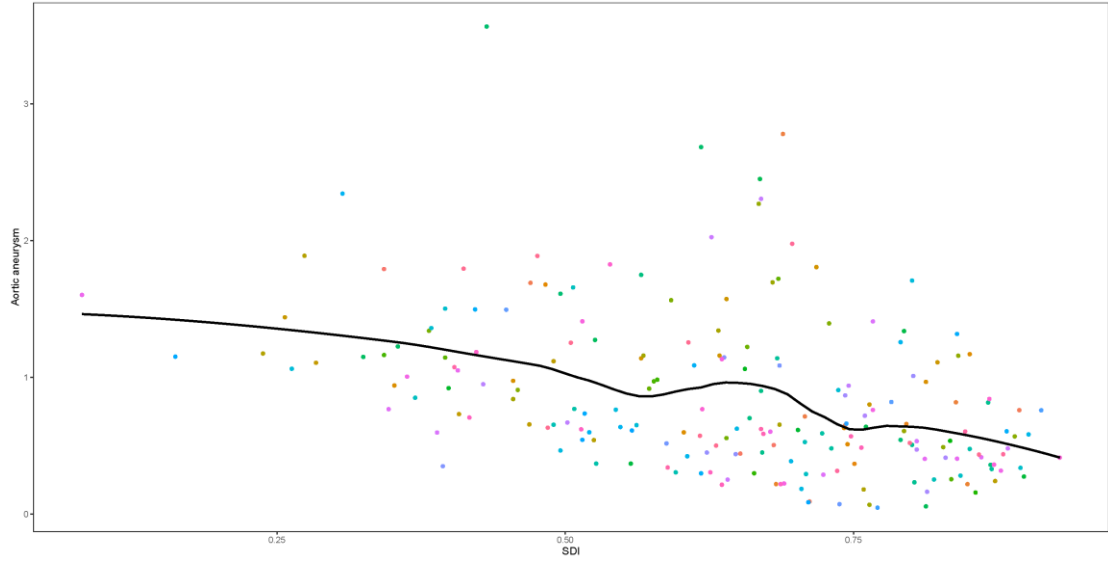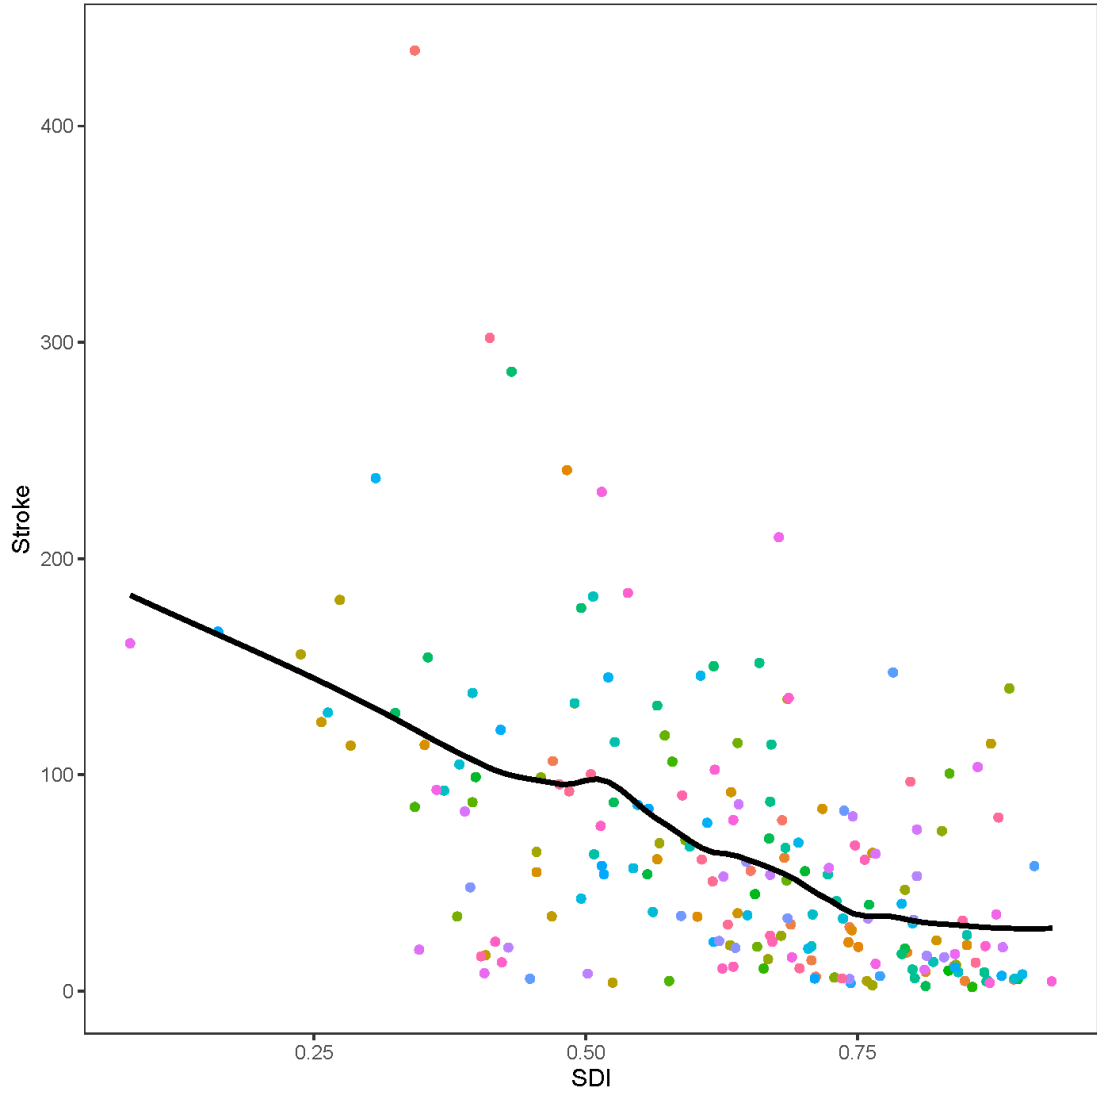

Supplement: Data_Sheet_2.pdf [file Data_Sheet_2.pdf]
