# Supplementary material for: Trends in global burden of diseases attributable to lead exposure in 204 countries and territories from 1990 to 2019
Source: Front Public Health. 2022 Nov 23;10:1036398. doi: 10.3389/fpubh.2022.1036398 (PMC9727290; doi:10.3389/fpubh.2022.1036398)
Supplement: Supplementary file 1 [file Data_Sheet_1.XLSX]

## Sheet: Table 1
Table 1 Deaths attributable to lead exposure in 2019 by countries
location_name	deaths	lower	upper
Afghanistan	8554.89	6016	11511.2
Albania	505.14	262.655	825.041
Algeria	3899.05	1918.54	6212.09
American Samoa	0.471233	0.000372946	2.02014
Andorra	2.7666	0.360857	5.96157
Angola	1220.03	628.824	1942.28
Antigua and Barbuda	5.97232	2.03896	10.6813
Argentina	1688.18	200.29	3564.65
Armenia	383.046	146.124	653.831
Australia	1668.68	825.822	2594.74
Austria	491.72	71.5407	1084.93
Azerbaijan	937.215	238.798	1748.15
Bahamas	16.4155	2.51682	36.4394
Bahrain	31.8831	8.70715	61.024
Bangladesh	30776.6	20283.9	42149.4
Barbados	21.831	6.56975	39.5107
Belarus	974.384	93.0099	2247.3
Belgium	1450.08	855.256	2081.21
Belize	18.1982	8.37599	29.393
Benin	582.276	321.531	898.677
Bermuda	3.96742	0.894098	7.84488
Bhutan	54.7829	29.1105	85.3409
Bolivia (Plurinational State of)	895.526	491.895	1401.76
Bosnia and Herzegovina	758.041	411.394	1178.35
Botswana	142.988	64.592	238.624
Brazil	13743.5	6507.54	21880.3
Brunei Darussalam	8.74004	1.58359	18.5111
Bulgaria	1815.79	453.926	3558.32
Burkina Faso	1433.73	895.67	2096.1
Burundi	505.62	253.731	810.775
Cabo Verde	27.0077	8.58458	48.1105
Cambodia	1448.61	773.482	2212.62
Cameroon	1406.48	749.832	2235.64
Canada	845.048	9.82692	2073.29
Central African Republic	382.58	191.078	615.725
Chad	897.295	553.651	1317.49
Chile	215.749	-1.38289e-11	677.367
China	282200	177009	400748
Colombia	3654.88	2037.96	5733.72
Comoros	42.8078	19.1598	70.9135
Congo	211.151	68.5821	397.399
Cook Islands	0.169333	0.00596884	0.79407
Costa Rica	417.14	249.075	627.715
Croatia	354.885	17.5741	778.641
Cuba	2026.04	1187.43	3031.64
Cyprus	85.7615	32.6143	147.667
Czechia	788.527	92.4653	1652.86
C么te d'Ivoire	843.633	359.431	1411.09
Democratic People's Republic of Korea	3647.79	1673.52	5874.8
Democratic Republic of the Congo	4026.59	1940.51	6651.56
Denmark	183.46	1.24201	411.634
Djibouti	42.9256	17.9398	75.0807
Dominica	8.656	3.65129	14.9936
Dominican Republic	1809.78	1112.77	2651.88
Ecuador	766.413	301.259	1344.41
Egypt	19161	11627.2	28808.2
El Salvador	1059.2	704.148	1487.33
Equatorial Guinea	52.5365	28.2316	83.2338
Eritrea	259.77	114.419	449.273
Estonia	53.9162	-3.54381e-12	188.788
Eswatini	58.1426	22.7396	101.574
Ethiopia	5339.36	3310.61	7582.24
Fiji	13.8063	0.000794038	50.9536
Finland	83.7024	-1.41421e-11	346.777
France	4623.11	2035.27	7570.36
Gabon	66.4703	17.0748	128.862
Gambia	118.32	63.2045	186.352
Georgia	650.618	151.332	1303.27
Germany	4580.69	284.584	10733.7
Ghana	880.93	201.055	1751.31
Greece	1352.79	488.412	2357.38
Greenland	3.39804	1.26003	5.80788
Grenada	12.9789	7.17837	19.2736
Guam	1.09034	-1.83081e-13	5.54266
Guatemala	2038.52	1428.17	2782.38
Guinea	802.144	463.179	1212.59
Guinea-Bissau	113.135	59.5342	177.545
Guyana	132.973	74.4364	205.431
Haiti	2340.26	1488.9	3424.37
Honduras	1628.57	1146.27	2225.32
Hungary	907.575	118.737	2014.39
Iceland	10.7443	1.19048	22.6991
India	232513	161336	310527
Indonesia	27399.7	13714.2	43047.2
Iran (Islamic Republic of)	14878.4	10366	20243.2
Iraq	3635.14	1916.89	5507.9
Ireland	225.44	69.8739	399.618
Israel	227.374	38.3976	448.546
Italy	6097.32	2162.11	11067.9
Jamaica	321.737	177.433	498.377
Japan	3923.5	197.768	9663.83
Jordan	446.331	185.495	745.23
Kazakhstan	1212.79	244.064	2376.56
Kenya	1389.12	600.04	2352.7
Kiribati	6.59482	1.19556	14.2731
Kuwait	132.442	51.9917	228.557
Kyrgyzstan	496.378	183.173	837.344
Lao People's Democratic Republic	543.515	249.545	886.513
Latvia	112.673	-2.6581e-12	321.921
Lebanon	645.567	312.648	1013.46
Lesotho	240.29	132.056	380.156
Liberia	224.608	117.708	354.364
Libya	397.523	160.757	697.218
Lithuania	131.391	-8.48162e-12	418.719
Luxembourg	19.1829	1.85898	40.911
Madagascar	1378	598.672	2422.54
Malawi	822.4	457.985	1262.17
Malaysia	1149.09	173.082	2358.55
Maldives	17.6865	7.42322	29.9581
Mali	1224.26	744.456	1792
Malta	98.5212	66.3054	138.913
Marshall Islands	2.16149	0.22788	5.38862
Mauritania	122.056	44.6328	215.274
Mauritius	66.0618	8.35055	148.354
Mexico	12211.6	7624.42	17578.7
Micronesia (Federated States of)	6.02684	1.23955	13.6717
Monaco	2.63416	0.431252	5.27634
Mongolia	307.761	114.198	550.846
Montenegro	48.9635	1.08314	112.342
Morocco	5512.4	2885.03	8396.83
Mozambique	2151.69	1323.06	3169.84
Myanmar	5232.35	2458.02	8576.27
Namibia	135.428	58.7253	223.579
Nauru	0.0981159	0.000991122	0.413631
Nepal	3757.44	2521.62	5168.16
Netherlands	663.655	107.674	1298.93
New Zealand	283.156	101.865	485.764
Nicaragua	714.31	464.019	995.318
Niger	1266.89	799.267	1823.05
Nigeria	5472.26	2348.26	9269.23
Niue	0.0317326	0.00769203	0.105898
North Macedonia	312.464	82.7564	581.58
Northern Mariana Islands	0.223628	-2.53215e-14	1.28904
Norway	197.054	39.7773	388.033
Oman	164.206	70.6566	269.168
Pakistan	21167.4	12736.4	31148
Palau	0.149065	0.00157925	0.811806
Palestine	318.742	172.395	491.758
Panama	301.573	171.573	446.811
Papua New Guinea	158.046	6.05734	443.588
Paraguay	461.81	231.332	734.2
Peru	1299.14	642.689	2158.86
Philippines	5390.48	2107.64	10340
Poland	3791.43	1186.16	6947.99
Portugal	1669.41	974.109	2407.88
Puerto Rico	166.934	20.1324	353.37
Qatar	21.3843	2.80896	47.0991
Republic of Korea	1862.73	582.778	3393.13
Republic of Moldova	385.002	56.9467	810.896
Romania	3774.46	1294.69	6705.78
Russian Federation	7470.75	96.5862	20943.2
Rwanda	479.409	225.443	793.305
Saint Kitts and Nevis	4.59611	1.54003	8.16378
Saint Lucia	19.0627	9.74365	30.0495
Saint Vincent and the Grenadines	23.6712	14.818	33.9545
Samoa	4.35705	0.0678735	13.0138
San Marino	1.67139	0.323295	3.45371
Sao Tome and Principe	9.28381	3.84338	15.3803
Saudi Arabia	1959.66	942.353	3146.08
Senegal	602.316	266.37	1007.23
Serbia	1457.81	464.665	2605.82
Seychelles	3.73562	0.17208	8.94831
Sierra Leone	403.939	212.833	649.456
Singapore	168.195	47.3688	309.676
Slovakia	415.924	46.8578	888.885
Slovenia	107.944	8.50907	243.748
Solomon Islands	49.9737	12.493	103.7
Somalia	1293.6	755.152	1956.46
South Africa	2345.39	788.961	4279.91
South Sudan	380.652	200.458	611.151
Spain	4181.71	1976.89	6781.49
Sri Lanka	653.627	28.6423	1588.24
Sudan	7701.12	5353.2	10883.1
Suriname	66.8208	34.6392	103.715
Sweden	287.687	4.64943	783.291
Switzerland	388.879	45.3901	817.658
Syrian Arab Republic	2687.47	1560.78	4062.59
Taiwan (Province of China)	1255.13	432.003	2236
Tajikistan	1278.21	743.098	1885.75
Thailand	1511.97	48.1163	3880.88
Timor-Leste	106.896	51.5882	167.637
Togo	295.145	121.38	513.865
Tokelau	0.0796242	0.034335	0.153022
Tonga	1.56866	0.0227272	4.38453
Trinidad and Tobago	46.2662	2.2234	118.647
Tunisia	1801.9	1003.95	2791.33
Turkey	4678.02	1469.89	8567.65
Turkmenistan	381.997	87.5513	753.433
Tuvalu	0.371576	0.0193792	1.06407
Uganda	1319.98	698.513	2066.38
Ukraine	3176.28	15.127	9357.98
United Arab Emirates	125.3	9.98313	326.259
United Kingdom	2309.53	370.365	4972.15
United Republic of Tanzania	2292.72	1116.77	3664.06
United States of America	20800	6129.03	38252.3
United States Virgin Islands	7.83989	0.712569	17.0444
Uruguay	297.449	119.613	490.348
Uzbekistan	2810.98	845.589	5222.98
Vanuatu	12.7276	1.53831	29.8002
Venezuela (Bolivarian Republic of)	3298.15	1801.65	5175.41
Viet Nam	7342	2799.4	12654.6
Yemen	6812.07	4785.12	9330.66
Zambia	623.478	255.661	1084.23
Zimbabwe	927.374	516.185	1431.7

## Sheet: Table 2
Table 2 DALYs attributable to lead exposure in 2019 by countries
location_name	DALYs	lower	upper
Afghanistan	283951	202566	380670
Albania	8770.25	4468.28	14201.3
Algeria	86852.3	44691.2	136920
American Samoa	14.2587	1.90822	51.9275
Andorra	41.4027	8.03976	88.7854
Angola	34306.7	17489.8	54720.1
Antigua and Barbuda	111.148	32.3164	205.741
Argentina	36690.7	8413.34	71201.2
Armenia	6925.03	2658.02	11856.5
Australia	25016.6	11979.1	39722.8
Austria	6196.27	1122.89	13562.2
Azerbaijan	20106.3	5128.45	38679.2
Bahamas	333.75	42.6207	791.784
Bahrain	1077.33	391.387	1952.7
Bangladesh	690421	460613	943665
Barbados	376.505	103.186	724.348
Belarus	19822.2	2709.74	44037.6
Belgium	20778.6	12285	29877.8
Belize	412.858	177.84	695.482
Benin	16477.6	8998.29	24692.5
Bermuda	60.4609	11.4411	125.184
Bhutan	1335.73	731.676	2060.39
Bolivia (Plurinational State of)	20381.8	11089.9	31897.3
Bosnia and Herzegovina	13686.6	7304.11	21313.4
Botswana	3659.96	1606.33	6292.73
Brazil	291911	134307	468526
Brunei Darussalam	197.286	29.9812	457.435
Bulgaria	30296.8	7129.84	60536
Burkina Faso	41360.6	25866.8	59020.7
Burundi	16682.2	8975.88	25875.1
Cabo Verde	520.912	165.831	942.71
Cambodia	40733.3	22778.3	61440.3
Cameroon	41586.1	21975.4	64480.4
Canada	16478.1	2943.02	37406.3
Central African Republic	12847.1	6925.59	19701.6
Chad	26854	16726.7	38321
Chile	5591.96	1009.09	14066.7
China	5.6579e+06	3.53738e+06	7.94851e+06
Colombia	59238	31726.3	93692.4
Comoros	970.443	435.086	1626.92
Congo	5609.68	1869.79	10366.4
Cook Islands	3.52675	0.311082	17.0392
Costa Rica	7906.85	4588.18	11716.6
Croatia	5494.81	525.515	12233.2
Cuba	36231.9	20695.6	54198.3
Cyprus	1443.98	577.823	2431.23
Czechia	12611.9	1794.86	27139
C么te d'Ivoire	25102.6	10933.1	42558
Democratic People's Republic of Korea	92638.8	44059.5	150144
Democratic Republic of the Congo	128537	67447.7	200608
Denmark	2590.26	81.6504	6103.53
Djibouti	1161.67	473.54	2058.08
Dominica	144.544	53.0036	259.525
Dominican Republic	37539.6	21849.4	55819
Ecuador	15433.6	5950.39	27084.5
Egypt	504964	313142	750465
El Salvador	19584	12799.7	27966.7
Equatorial Guinea	1174.22	601.857	1919.02
Eritrea	7940.82	3686.12	13529.8
Estonia	929.677	49.4365	2959.38
Eswatini	1585.5	654.791	2742.58
Ethiopia	140640	89155	199920
Fiji	435.407	62.7054	1437.29
Finland	1477.05	172.766	5057.59
France	63334.7	28252.1	104806
Gabon	1495.31	395.025	3000.82
Gambia	3107.77	1649.31	4977.78
Georgia	10825.6	2408.16	21436.8
Germany	65273	8020.02	147849
Ghana	23811.2	6814.94	47048.9
Greece	19286.4	7245.26	33090.7
Greenland	79.5748	29.2787	138.883
Grenada	269.727	139.704	413.438
Guam	24.6028	1.38893	127.813
Guatemala	43123.7	29881.6	58548.6
Guinea	21656.7	12409.8	32632.6
Guinea-Bissau	3456.16	1819.2	5406.98
Guyana	3109.63	1619.35	4888.39
Haiti	59768.2	37371.9	87222.9
Honduras	34884	24270.4	47134.2
Hungary	15809.3	2481.28	34083.6
Iceland	155.553	29.4934	328.394
India	6.96402e+06	4.95096e+06	9.09694e+06
Indonesia	711530	349816	1.15666e+06
Iran (Islamic Republic of)	320435	227956	419539
Iraq	95411.3	52113.5	145915
Ireland	3507.65	1130.08	6358.6
Israel	3733.89	975.837	7175.77
Italy	76616.2	28096.6	134639
Jamaica	5707.31	2916.52	9086.77
Japan	54500.8	6133.52	134791
Jordan	13618.4	6681.93	21659.2
Kazakhstan	25391.1	5115.55	52357.8
Kenya	39418.9	18844.4	64286.8
Kiribati	244.306	69.1806	506.176
Kuwait	3617.32	1448.38	6395
Kyrgyzstan	11740	4789.1	19507.8
Lao People's Democratic Republic	15270	7330.75	24923.5
Latvia	2038.38	102.789	5587.79
Lebanon	12100	5937.13	19400.8
Lesotho	6491.59	3591.63	10145
Liberia	7199.22	3991.43	10876.3
Libya	9533.26	4094.4	16469.2
Lithuania	2340.31	113.098	6954.59
Luxembourg	282.944	44.281	605.376
Madagascar	40977.8	18779.6	71200.8
Malawi	24319.4	13895.8	35974.5
Malaysia	29137	5830.75	60844.6
Maldives	443.718	190.574	743.854
Mali	34478.4	21173.7	49838
Malta	1622.39	1114.89	2210.61
Marshall Islands	73.5515	16.1766	173.33
Mauritania	3087.78	1230.48	5360.8
Mauritius	1521.23	248.253	3381.02
Mexico	245356	146211	356440
Micronesia (Federated States of)	193.763	48.9174	425.981
Monaco	33.5391	4.8943	70.6226
Mongolia	7814	2615.07	14598.6
Montenegro	898.694	71.5814	2058.54
Morocco	125845	66688.7	191108
Mozambique	61823.4	38059.8	90691.5
Myanmar	135455	63982.1	220546
Namibia	3135.79	1356.88	5253.02
Nauru	4.52455	0.801691	15.4962
Nepal	105585	73134.2	143645
Netherlands	9767.26	1940.29	19565.1
New Zealand	4777.56	1953.06	7956.46
Nicaragua	13558.8	8578.32	19192.1
Niger	41272.8	26619.5	57310.1
Nigeria	162719	80231.1	259028
Niue	0.517924	0.109432	2.13382
North Macedonia	5886.88	1569.14	11174
Northern Mariana Islands	6.65021	0.48939	35.8837
Norway	2937.25	701.921	5829.41
Oman	4537.26	2190.91	7490.55
Pakistan	678026	411603	982017
Palau	4.67767	0.471363	23.4038
Palestine	8613.61	5036.58	12804.8
Panama	5527.73	3081.35	8500.24
Papua New Guinea	6692.69	1762.98	15708.8
Paraguay	9451.16	4627.45	15533.5
Peru	27915.6	14170.7	46189.4
Philippines	164164	72863.8	298479
Poland	65784.4	21544.2	117374
Portugal	23681.3	13697.7	34329.4
Puerto Rico	2647.28	337.617	6010.4
Qatar	975.507	289.639	1881.81
Republic of Korea	30940.9	8514.44	57752
Republic of Moldova	8041.95	1725.47	15980.2
Romania	62341.3	20695.2	112650
Russian Federation	159732	12746.8	429102
Rwanda	13563.8	6755.53	21710.2
Saint Kitts and Nevis	95.2683	27.7652	179.783
Saint Lucia	347.826	163.621	563.868
Saint Vincent and the Grenadines	437.969	263.761	633.123
Samoa	132.075	26.6679	348.259
San Marino	22.9607	5.28355	47.8545
Sao Tome and Principe	233.571	95.86	394.483
Saudi Arabia	58723.6	26928	97434.2
Senegal	15227.3	7113.81	25099.6
Serbia	25487.9	8692.43	45380.4
Seychelles	89.6088	10.7562	212.626
Sierra Leone	12191.1	6666.64	19197.6
Singapore	3225.24	723.97	6241.68
Slovakia	7268.89	993.769	15771.5
Slovenia	1624.84	225.761	3555.91
Solomon Islands	1706.16	534.54	3473.97
Somalia	52776.7	32412.7	75147.8
South Africa	54876	19328.8	98345.8
South Sudan	9244.7	4780.72	14697.5
Spain	65932.4	34600.8	101512
Sri Lanka	17247.4	2962.85	39294.3
Sudan	207362	144189	286542
Suriname	1408.83	656.282	2284.38
Sweden	4832.63	730.981	11717.6
Switzerland	5119.39	934.417	10292.7
Syrian Arab Republic	67970.6	40491.8	99934.4
Taiwan (Province of China)	26238.4	8743.25	46984.3
Tajikistan	31469.7	18606.9	45791.2
Thailand	44778.5	9556.76	102032
Timor-Leste	2836.21	1456.01	4435.11
Togo	9267.57	4161.38	15684.6
Tokelau	1.21273	0.409357	2.83178
Tonga	47.5176	11.0439	114.823
Trinidad and Tobago	880.289	55.7842	2456.92
Tunisia	37356.7	21341.7	57240
Turkey	94642.3	34266.4	171179
Turkmenistan	8659.13	1858.44	17875.2
Tuvalu	10.9473	2.13444	29.5984
Uganda	39466.1	21835.9	60730.1
Ukraine	59476.2	3372.27	174399
United Arab Emirates	5247.36	1113.5	12668
United Kingdom	35994.3	7799.22	77274
United Republic of Tanzania	58916.1	29694.7	93199.1
United States of America	347835	99195.9	659422
United States Virgin Islands	139.651	10.5187	320.794
Uruguay	5593.76	2482.52	8891.3
Uzbekistan	70621.5	22081.9	131200
Vanuatu	401.065	92.727	892.858
Venezuela (Bolivarian Republic of)	68970.6	36661.6	109765
Viet Nam	179763	69634.6	309928
Yemen	198144	139198	263938
Zambia	16399.8	6845.13	28622.5
Zimbabwe	27402.3	15668.3	40948.7

## Sheet: Table 3
Table 3 ASMR attributable to lead exposure in 2019 by countries
location_name	ASMR	lower	upper
Afghanistan	82.7914	59.2915	113.165
Albania	12.1377	6.28087	19.9463
Algeria	16.6775	8.73157	26.1039
American Samoa	1.21765	0.00194287	4.89806
Andorra	1.67641	0.204381	3.62973
Angola	14.9852	8.17899	23.1862
Antigua and Barbuda	6.95056	2.55804	12.1187
Argentina	3.04203	0.352922	6.44775
Armenia	9.87091	3.84394	16.8596
Australia	3.4124	1.64623	5.33391
Austria	2.11072	0.2797	4.74328
Azerbaijan	16.3333	5.18554	28.8774
Bahamas	4.93258	0.874939	10.6495
Bahrain	6.89573	2.55972	12.1683
Bangladesh	27.2103	18.056	36.9689
Barbados	4.43409	1.34771	8.06214
Belarus	5.98457	0.5743	13.8048
Belgium	5.01577	2.92655	7.18126
Belize	7.61683	3.71366	12.0338
Benin	14.8051	8.49226	22.3411
Bermuda	2.76669	0.598322	5.51421
Bhutan	11.5647	6.43196	17.74
Bolivia (Plurinational State of)	12.0718	6.83419	18.8972
Bosnia and Herzegovina	13.7355	7.44612	21.3965
Botswana	13.5828	6.49424	22.1338
Brazil	6.10643	2.94298	9.68695
Brunei Darussalam	5.40407	1.29944	10.5293
Bulgaria	12.3206	3.07127	24.2211
Burkina Faso	19.3792	12.5402	27.7647
Burundi	15.3477	8.27593	23.4701
Cabo Verde	6.6143	2.15734	11.6525
Cambodia	14.6223	7.99908	21.9492
Cameroon	14.4824	8.0275	22.4178
Canada	1.06995	0.0102226	2.68053
Central African Republic	22.5286	11.9266	35.9345
Chad	19.4508	12.2888	28.3539
Chile	0.906629	-5.71099e-14	2.84945
China	16.7437	10.3572	23.8148
Colombia	6.49683	3.58391	10.2546
Comoros	10.6671	5.06489	17.4902
Congo	11.31	4.21129	20.3804
Cook Islands	0.762569	0.0415844	3.42138
Costa Rica	8.03212	4.7807	12.0941
Croatia	3.81998	0.222724	8.38783
Cuba	9.98166	5.82344	14.9297
Cyprus	5.3375	2.09975	9.12298
Czechia	3.52928	0.405166	7.45921
C么te d'Ivoire	10.8018	5.13849	17.2351
Democratic People's Republic of Korea	12.3897	5.80408	19.9347
Democratic Republic of the Congo	14.5845	7.38931	23.93
Denmark	1.38731	0.00788278	3.17153
Djibouti	11.1779	5.35752	18.255
Dominica	9.4888	3.98755	16.528
Dominican Republic	21.0494	13.1323	30.6399
Ecuador	6.02924	2.48107	10.2954
Egypt	39.2665	24.7852	58.9845
El Salvador	16.6076	11.091	23.3728
Equatorial Guinea	15.241	8.61723	23.3279
Eritrea	14.5964	7.22038	24.1505
Estonia	1.78965	-1.10891e-13	6.23372
Eswatini	12.7483	5.28529	22.2093
Ethiopia	16.8338	10.7181	23.817
Fiji	2.62279	0.000870688	8.68831
Finland	0.555073	-9.26915e-14	2.34676
France	2.39987	1.01077	3.99273
Gabon	8.24213	2.33584	15.5957
Gambia	14.9399	8.33467	23.0631
Georgia	9.72425	2.16414	19.6722
Germany	1.95459	0.110914	4.6355
Ghana	7.28818	1.98449	13.6582
Greece	4.47868	1.56057	7.83039
Greenland	6.15504	2.5548	10.4027
Grenada	13.4603	7.65276	19.8669
Guam	0.581363	-9.89705e-14	2.95599
Guatemala	22.4021	15.7953	29.9275
Guinea	16.8808	10.052	25.0105
Guinea-Bissau	19.701	11.0672	29.9669
Guyana	25.1506	14.3663	38.0152
Haiti	41.634	27.4214	60.0898
Honduras	32.6016	22.9491	44.1941
Hungary	4.39223	0.546206	9.78711
Iceland	1.54755	0.149371	3.34218
India	23.3987	16.4964	31.2959
Indonesia	16.2845	8.51056	24.9369
Iran (Islamic Republic of)	23.9723	16.5122	32.6819
Iraq	20.6526	11.5013	30.7978
Ireland	2.86007	0.875179	5.09043
Israel	1.72674	0.276742	3.4443
Italy	3.09109	1.04237	5.6647
Jamaica	9.84863	5.33479	15.4056
Japan	0.723894	0.0290941	1.84716
Jordan	10.1829	4.70439	16.9468
Kazakhstan	9.17996	2.1557	17.5359
Kenya	8.97652	4.17036	14.8824
Kiribati	11.7604	3.0363	23.3641
Kuwait	6.72699	3.00329	11.0213
Kyrgyzstan	13.6013	5.38039	22.6525
Lao People's Democratic Republic	15.3219	7.4787	23.9971
Latvia	2.54764	-5.24127e-14	7.3024
Lebanon	12.8614	6.21369	20.1314
Lesotho	22.8298	12.8506	35.8547
Liberia	13.859	7.71564	20.8478
Libya	9.56268	4.10112	16.1989
Lithuania	2.0486	-1.103e-13	6.52497
Luxembourg	1.62773	0.140333	3.51137
Madagascar	17.9808	9.03818	29.6916
Malawi	14.5027	8.38101	21.8173
Malaysia	5.02989	0.858584	10.0632
Maldives	7.2731	3.26641	11.937
Mali	18.1824	11.4939	26.0454
Malta	9.68672	6.54504	13.5407
Marshall Islands	9.47541	1.95172	20.002
Mauritania	7.16935	2.78639	12.2564
Mauritius	4.09038	0.547274	9.12183
Mexico	11.4944	7.25329	16.55
Micronesia (Federated States of)	10.616	2.93988	22.5781
Monaco	2.08765	0.313815	4.29037
Mongolia	19.4986	8.6508	32.5404
Montenegro	5.45296	0.170111	12.422
Morocco	22.3337	11.9629	33.8839
Mozambique	24.8521	15.7094	36.4297
Myanmar	13.2059	6.35956	21.0677
Namibia	11.3322	5.00096	18.6176
Nauru	4.14588	0.297485	13.1179
Nepal	19.8525	13.2843	27.394
Netherlands	1.71963	0.269915	3.40248
New Zealand	3.26673	1.18027	5.63119
Nicaragua	21.0856	13.9329	29.246
Niger	21.0571	13.768	29.9586
Nigeria	8.024	3.54729	13.3636
Niue	1.84382	0.557121	5.3848
North Macedonia	12.7683	3.72149	23.3235
Northern Mariana Islands	0.648818	-5.81413e-14	3.40825
Norway	1.69146	0.330467	3.36615
Oman	18.1754	9.07415	28.319
Pakistan	23.2867	14.5146	33.3937
Palau	1.0293	0.0457122	4.78357
Palestine	19.4839	10.8737	29.1904
Panama	7.02205	3.98153	10.4058
Papua New Guinea	4.82484	0.394692	11.8298
Paraguay	8.86866	4.47061	13.9974
Peru	3.96569	1.95939	6.59378
Philippines	7.90619	3.21983	15.0782
Poland	5.08102	1.56009	9.31738
Portugal	5.59581	3.21753	8.08019
Puerto Rico	1.92093	0.197557	4.27312
Qatar	8.0749	2.30785	15.2053
Republic of Korea	2.30738	0.738505	4.1865
Republic of Moldova	6.61633	0.97369	13.9582
Romania	9.47813	3.2134	16.906
Russian Federation	3.1814	0.0413513	8.96398
Rwanda	11.203	5.65065	17.8577
Saint Kitts and Nevis	9.07609	3.50861	15.3515
Saint Lucia	9.57545	4.97506	14.9832
Saint Vincent and the Grenadines	19.6714	12.3265	28.1934
Samoa	3.54804	0.0834766	10.0354
San Marino	1.96728	0.350736	4.10464
Sao Tome and Principe	11.3919	5.08142	18.2654
Saudi Arabia	16.1906	9.11288	24.1026
Senegal	10.1184	4.79965	16.4154
Serbia	10.3702	3.4283	18.5398
Seychelles	3.92615	0.216009	9.29794
Sierra Leone	13.7503	7.67553	21.6486
Singapore	2.34242	0.697288	4.26196
Slovakia	4.61493	0.536054	9.94537
Slovenia	2.05085	0.148462	4.66152
Solomon Islands	20.8816	7.1269	38.428
Somalia	26.2823	15.9362	38.9754
South Africa	6.37078	2.21924	11.492
South Sudan	13.5203	7.62118	21.0405
Spain	3.27809	1.50257	5.31617
Sri Lanka	2.9921	0.168922	7.09249
Sudan	50.2747	35.2273	70.316
Suriname	11.9978	6.3929	18.5064
Sweden	1.08524	0.0157463	2.97961
Switzerland	1.68176	0.180415	3.53418
Syrian Arab Republic	29.785	17.9219	44.1805
Taiwan (Province of China)	3.07538	1.04737	5.52667
Tajikistan	41.7687	25.544	60.5756
Thailand	1.52589	0.0506271	3.90644
Timor-Leste	16.0565	8.26933	24.7929
Togo	10.8178	4.99639	17.9196
Tokelau	7.41613	3.37355	13.6412
Tonga	2.0801	0.0326379	5.7825
Trinidad and Tobago	2.62712	0.135635	6.67479
Tunisia	16.5266	9.36795	25.4896
Turkey	5.86226	1.92165	10.6614
Turkmenistan	12.1845	3.25086	23.066
Tuvalu	4.69494	0.515008	12.3057
Uganda	12.3569	6.86013	19.1113
Ukraine	4.12648	0.0251211	12.238
United Arab Emirates	8.3707	2.15324	16.8534
United Kingdom	1.57063	0.237993	3.43231
United Republic of Tanzania	12.0639	6.21068	18.7719
United States of America	3.2487	0.904524	6.07781
United States Virgin Islands	4.74459	0.585957	10.1623
Uruguay	4.88228	1.94963	8.01375
Uzbekistan	27.8519	11.4859	47.1221
Vanuatu	9.52972	1.68671	20.5134
Venezuela (Bolivarian Republic of)	11.9284	6.58543	18.6314
Viet Nam	9.1407	3.56829	15.5852
Yemen	63.9659	44.3283	85.9409
Zambia	13.0618	6.0063	21.7742
Zimbabwe	16.7061	9.60091	25.3014

## Sheet: Table 4
Table 4 ASMR attributable to lead exposure in 2019 by countries
location_name	ASDR	lower	upper
Afghanistan	1869.91	1349.83	2485.58
Albania	211.23	110.046	345.138
Algeria	283.679	152.226	444.882
American Samoa	29.8015	3.41858	108.712
Andorra	29.4589	6.38706	62.6691
Angola	303.06	162.19	476.832
Antigua and Barbuda	117.069	37.4449	212.863
Argentina	70.1672	17.1548	135.242
Armenia	173.943	70.3895	296.13
Australia	59.1846	28.4853	94.176
Austria	32.7579	7.24581	69.8463
Azerbaijan	260.55	77.0801	475.504
Bahamas	89.5882	13.1375	205.803
Bahrain	126.051	50.8185	216.961
Bangladesh	537.679	357.733	732.426
Barbados	78.0717	23.1448	151.15
Belarus	131.176	21.8454	288.313
Belgium	88.2655	51.7114	129.303
Belize	150.033	67.3399	245.408
Benin	309.148	177.168	461.553
Bermuda	45.6856	9.16369	96.1615
Bhutan	237.196	131.848	363.097
Bolivia (Plurinational State of)	233.39	129.033	367.253
Bosnia and Herzegovina	240.701	130.507	374.546
Botswana	273.655	126.29	455.564
Brazil	125.192	58.916	198.374
Brunei Darussalam	85.0333	17.3348	176.938
Bulgaria	213.843	51.3945	428.664
Burkina Faso	413.573	265.245	592.455
Burundi	322.267	173.468	492.539
Cabo Verde	122.26	38.0128	218.503
Cambodia	332.148	188.388	500.494
Cameroon	317.418	171.593	493.943
Canada	26.8423	6.48396	57.8931
Central African Republic	521.196	285.238	814.609
Chad	423.416	267.281	616.31
Chile	25.4847	5.32904	61.5717
China	299.281	187.802	422.108
Colombia	110.9	59.4077	176.131
Comoros	202.934	93.8595	336.303
Congo	220.41	78.2485	398.525
Cook Islands	15.5561	1.7881	71.6001
Costa Rica	154.374	90.5229	227.879
Croatia	64.6502	9.28868	141.802
Cuba	193.205	110.554	288.477
Cyprus	81.3878	33.5602	137.172
Czechia	61.2522	10.5291	132.105
C么te d'Ivoire	222.044	101.621	363.128
Democratic People's Republic of Korea	298.445	147.79	476.789
Democratic Republic of the Congo	318.409	165.79	502.7
Denmark	21.487	0.876046	51.3482
Djibouti	210.254	95.2021	353.581
Dominica	160.539	60.8133	289.214
Dominican Republic	407.889	241.485	601.806
Ecuador	105.753	42.5081	184.811
Egypt	800.041	500.904	1185.55
El Salvador	325.795	211.705	467.013
Equatorial Guinea	269.62	145.407	424.264
Eritrea	290.082	140.637	478.604
Estonia	39.0146	3.6825	114.96
Eswatini	268.871	111.275	460.871
Ethiopia	321.818	206.856	449.06
Fiji	59.7947	7.23737	192.27
Finland	14.5187	2.57671	42.8829
France	44.8061	19.6394	73.9363
Gabon	152.429	41.9988	294.12
Gambia	305.178	162.368	477.964
Georgia	180.63	43.1674	359.98
Germany	34.0823	5.66062	75.0938
Ghana	145.114	39.4305	279.599
Greece	81.4564	31.4102	140.905
Greenland	123.164	50.6558	210.869
Grenada	250.439	134.228	379.66
Guam	13.2003	0.788838	67.7098
Guatemala	397.593	279.072	532.354
Guinea	362.648	210.589	544.898
Guinea-Bissau	433.516	235.87	672.046
Guyana	502.224	271.339	777.175
Haiti	847.915	543.243	1232.57
Honduras	597.104	418.404	812.085
Hungary	85.5043	15.3618	185.375
Iceland	27.3598	5.91681	56.6762
India	589.04	422.517	770.665
Indonesia	338.332	175.895	528.233
Iran (Islamic Republic of)	454.392	323.19	597.628
Iraq	413.922	227.023	617.645
Ireland	47.3274	15.8612	85.9791
Israel	32.2564	9.13585	62.0631
Italy	49.7585	19.145	87.2096
Jamaica	188.632	96.5503	300.819
Japan	14.7718	2.52635	37.2796
Jordan	205.895	102.194	331.448
Kazakhstan	160.26	36.2115	319.311
Kenya	175.585	84.2982	288.332
Kiribati	305.996	85.2606	619.917
Kuwait	136.523	59.6274	225.186
Kyrgyzstan	261.989	109.357	434.106
Lao People's Democratic Republic	336.547	166.647	540.073
Latvia	56.4182	5.1784	149.197
Lebanon	233.978	114.627	374.265
Lesotho	500.346	281.832	781.361
Liberia	302.935	170.706	465.397
Libya	193.592	85.8106	325.713
Lithuania	44.9818	3.88573	126.78
Luxembourg	27.384	4.81192	58.5249
Madagascar	361.051	172.272	609.8
Malawi	301.814	178.404	448.802
Malaysia	109.726	22.2372	225.017
Maldives	144.177	65.5269	235.872
Mali	368.748	232.654	527.06
Malta	175.774	120.516	241.941
Marshall Islands	206.686	47.25	463.237
Mauritania	142.101	55.4389	248.228
Mauritius	90.5973	17.2294	199.255
Mexico	214.56	130.434	310.552
Micronesia (Federated States of)	254.985	71.6589	546.779
Monaco	31.538	4.51723	69.0958
Mongolia	358.039	144.771	626.858
Montenegro	96.8382	10.6258	217.259
Morocco	426.553	230.035	636.551
Mozambique	526.552	325.597	760.7
Myanmar	291.71	142.984	468.638
Namibia	224.977	98.8442	371.168
Nauru	89.1119	10.6707	296.662
Nepal	456.44	315.09	615.151
Netherlands	28.4663	6.34931	57.0147
New Zealand	63.4977	27.178	105.371
Nicaragua	338.91	219.81	473.612
Niger	455.569	297.636	636.288
Nigeria	169.057	79.137	274.448
Niue	27.2523	7.043	101.967
North Macedonia	205.699	60.5267	381.914
Northern Mariana Islands	14.2584	1.02877	69.7996
Norway	29.8364	7.71286	58.8486
Oman	305.945	149.322	481.836
Pakistan	542.513	340.576	774.512
Palau	24.13	2.8716	108.816
Palestine	364.457	213.656	544.197
Panama	132.56	73.9378	203.98
Papua New Guinea	118.008	23.457	284.896
Paraguay	171.229	85.1445	276.006
Peru	85.7058	43.7312	142.039
Philippines	195.301	86.5836	356.045
Poland	96.2446	32.464	172.96
Portugal	96.2076	55.5655	140.474
Puerto Rico	36.9688	5.27709	87.5935
Qatar	123.843	38.4549	232.848
Republic of Korea	36.0313	10.4476	67.3617
Republic of Moldova	148.642	36.3325	287.599
Romania	169.748	57.2326	306.528
Russian Federation	72.7423	7.79062	191.812
Rwanda	219.21	108.189	352.691
Saint Kitts and Nevis	158.705	54.0738	287.778
Saint Lucia	167.009	80.3427	268.612
Saint Vincent and the Grenadines	336.328	203.833	483.214
Samoa	84.0817	13.4462	226.17
San Marino	33.898	8.45405	72.8191
Sao Tome and Principe	221.165	94.1399	362.385
Saudi Arabia	326.749	172.938	497.945
Senegal	198.068	92.4721	327.827
Serbia	172.102	62.9126	307.71
Seychelles	84.0728	11.1094	195.564
Sierra Leone	301.261	165.366	470.694
Singapore	42.3512	10.2128	80.3695
Slovakia	81.9825	13.3599	175.354
Slovenia	37.9452	7.20557	80.3655
Solomon Islands	489.867	161.265	950.271
Somalia	613.377	388.207	878.302
South Africa	125.642	45.4233	223.084
South Sudan	253.419	136.636	398.885
Spain	75.3044	40.9347	112.86
Sri Lanka	71.9732	13.8823	160.853
Sudan	1041.62	736.796	1419.62
Suriname	237.647	115.131	381.01
Sweden	25.3463	5.87541	56.5052
Switzerland	28.5788	6.4694	56.573
Syrian Arab Republic	577.795	352.372	834.771
Taiwan (Province of China)	68.5518	24.7719	122.649
Tajikistan	730.187	439.729	1052.75
Thailand	49.4431	12.808	106.523
Timor-Leste	341.341	173.015	532.913
Togo	232.575	106.894	391.172
Tokelau	99.1373	36.6427	223.169
Tonga	55.4463	10.8763	139.326
Trinidad and Tobago	48.7393	3.71899	133.432
Tunisia	313.159	180.609	477.371
Turkey	112.515	42.1764	201.171
Turkmenistan	234.523	55.633	461.545
Tuvalu	108.275	21.2283	286.766
Uganda	250.319	139.222	384.166
Ukraine	81.9618	7.1771	233.768
United Arab Emirates	150.797	37.8131	303.938
United Kingdom	29.1365	6.86763	62.0833
United Republic of Tanzania	233.448	117.181	366.281
United States of America	62.7323	18.21	120.328
United States Virgin Islands	77.648	8.52711	177.905
Uruguay	109.096	49.669	171.902
Uzbekistan	445.752	169.484	787.897
Vanuatu	215.804	46.7479	482.94
Venezuela (Bolivarian Republic of)	238.881	129.461	377.328
Viet Nam	197.029	80.5484	333.934
Yemen	1362.77	971.755	1816.46
Zambia	246.126	106.261	421.569
Zimbabwe	366.147	210.382	547.761

## Sheet: Table 5
Table 5 EAPC of ASMR attributable to lead exposure in 2019 by countries
location_name	EAPC of ASMR	lower	upper
Afghanistan	-0.316451	-0.569409	-0.0628505
Albania	-0.0537387	-0.2635	0.156464
Algeria	-1.82239	-1.86358	-1.78118
American Samoa	-1.41525	-1.46675	-1.36373
Andorra	-1.49192	-1.56032	-1.42347
Angola	-0.644202	-0.856584	-0.431364
Antigua and Barbuda	-1.22393	-1.41061	-1.0369
Argentina	-1.55543	-1.66271	-1.44803
Armenia	-1.27658	-1.55021	-1.00219
Australia	-3.80538	-3.94172	-3.66886
Austria	-2.74659	-2.93794	-2.55486
Azerbaijan	1.63621	1.31313	1.96032
Bahamas	-1.27854	-1.45605	-1.10071
Bahrain	-3.2697	-3.59811	-2.94017
Bangladesh	-0.456572	-0.977103	0.066695
Barbados	-2.19774	-2.35044	-2.0448
Belarus	0.286009	-0.298535	0.87398
Belgium	-3.02492	-3.19397	-2.85556
Belize	-1.83564	-2.29975	-1.36933
Benin	0.109976	-0.0683018	0.288572
Bermuda	-3.51498	-3.63874	-3.39107
Bhutan	-0.610448	-0.727309	-0.49345
Bolivia (Plurinational State of)	-0.525935	-0.629768	-0.421994
Bosnia and Herzegovina	-1.0887	-1.29904	-0.877911
Botswana	-1.16316	-1.6316	-0.692492
Brazil	-2.68824	-2.74593	-2.63052
Brunei Darussalam	-2.31105	-2.50621	-2.11549
Bulgaria	-1.15943	-1.57271	-0.744409
Burkina Faso	1.26248	1.02968	1.49581
Burundi	-1.56956	-1.65967	-1.47937
Cabo Verde	-0.46574	-0.783539	-0.146923
Cambodia	-0.267749	-0.376608	-0.158771
Cameroon	0.815149	0.474949	1.1565
Canada	-3.93667	-4.13127	-3.74167
Central African Republic	0.134891	0.04159	0.228279
Chad	1.00886	0.757329	1.26103
Chile	-2.12797	-2.21714	-2.03873
China	-0.911268	-1.07214	-0.750132
Colombia	-3.51296	-3.65731	-3.36839
Comoros	-1.76923	-1.87247	-1.66587
Congo	-1.36242	-1.48551	-1.23917
Cook Islands	-2.69959	-2.82654	-2.57248
Costa Rica	-1.84565	-2.06702	-1.62378
Croatia	-1.62867	-1.86343	-1.39335
Cuba	-1.51793	-1.6644	-1.37124
Cyprus	-3.4504	-3.70292	-3.19723
Czechia	-3.09647	-3.27551	-2.9171
C么te d'Ivoire	-0.308404	-0.575486	-0.0406048
Democratic People's Republic of Korea	0.85397	0.577235	1.13147
Democratic Republic of the Congo	0.203467	0.0723286	0.334777
Denmark	-3.84619	-4.04137	-3.65061
Djibouti	-0.965959	-1.11017	-0.821541
Dominica	-1.24027	-1.322	-1.15848
Dominican Republic	1.3067	1.08456	1.52932
Ecuador	0.115748	-0.179659	0.41203
Egypt	-0.0678824	-0.222719	0.0871945
El Salvador	-0.588772	-0.735229	-0.442097
Equatorial Guinea	-2.49354	-2.71993	-2.26661
Eritrea	-1.19676	-1.33442	-1.0589
Estonia	-1.56796	-1.83824	-1.29693
Eswatini	0.191055	-0.330901	0.715745
Ethiopia	-2.04447	-2.17053	-1.91824
Fiji	-2.09365	-2.30411	-1.88273
Finland	-2.99712	-3.04468	-2.94954
France	-3.42229	-3.61162	-3.23258
Gabon	-1.15114	-1.35441	-0.94745
Gambia	0.616672	0.452869	0.780743
Georgia	-0.309786	-0.593019	-0.0257463
Germany	-2.53129	-2.65883	-2.40358
Ghana	0.276375	0.0497795	0.503483
Greece	-2.18686	-2.46778	-1.90513
Greenland	-2.52369	-2.7936	-2.25303
Grenada	-1.94413	-2.06949	-1.8186
Guam	-3.55953	-3.9392	-3.17836
Guatemala	-1.00556	-1.20193	-0.808797
Guinea	1.14944	0.967907	1.3313
Guinea-Bissau	0.210704	0.0328539	0.38887
Guyana	-1.35358	-1.4768	-1.23021
Haiti	-0.445698	-0.509716	-0.381638
Honduras	1.18203	0.943027	1.42161
Hungary	-1.98238	-2.09382	-1.87081
Iceland	-3.7778	-3.99178	-3.56335
India	-0.962162	-1.13681	-0.787203
Indonesia	0.366102	0.18563	0.546899
Iran (Islamic Republic of)	-1.88251	-2.09686	-1.66769
Iraq	-0.903871	-1.0619	-0.745588
Ireland	-4.33776	-4.55631	-4.11871
Israel	-4.37048	-4.52434	-4.21638
Italy	-2.85325	-2.97745	-2.72888
Jamaica	-1.00574	-1.33557	-0.674805
Japan	-4.21499	-4.31649	-4.11338
Jordan	-2.50088	-2.72083	-2.28044
Kazakhstan	-0.720227	-1.43062	-0.00471314
Kenya	-0.617626	-0.845568	-0.389161
Kiribati	-0.333525	-0.42496	-0.242006
Kuwait	-1.81826	-2.33163	-1.30218
Kyrgyzstan	1.04685	0.506339	1.59027
Lao People's Democratic Republic	-0.488655	-0.717338	-0.259445
Latvia	-1.45459	-1.84445	-1.06319
Lebanon	-1.60716	-1.74566	-1.46846
Lesotho	1.56845	1.22055	1.91755
Liberia	0.279102	0.122806	0.435642
Libya	-1.21236	-1.36069	-1.0638
Lithuania	-0.867021	-1.2079	-0.524966
Luxembourg	-4.10702	-4.30702	-3.90661
Madagascar	-0.730655	-0.94449	-0.516359
Malawi	-0.86049	-1.13788	-0.58232
Malaysia	-1.36304	-1.66514	-1.06002
Maldives	-3.46549	-3.6652	-3.26536
Mali	0.32029	0.250319	0.390309
Malta	-2.68872	-2.82226	-2.555
Marshall Islands	-0.893355	-1.04005	-0.746448
Mauritania	-1.12711	-1.18281	-1.07139
Mauritius	-3.00602	-3.30371	-2.70741
Mexico	-0.412967	-0.487239	-0.338639
Micronesia (Federated States of)	-0.912814	-0.984195	-0.841382
Monaco	-2.41201	-2.52298	-2.30092
Mongolia	-1.09456	-1.60433	-0.582145
Montenegro	0.85883	0.541499	1.17716
Morocco	-0.601905	-0.753492	-0.450086
Mozambique	0.460148	0.289287	0.6313
Myanmar	-1.25432	-1.45048	-1.05777
Namibia	-0.763342	-1.13511	-0.39018
Nauru	-0.603398	-0.909509	-0.296342
Nepal	0.313436	0.21135	0.415625
Netherlands	-3.83738	-4.12359	-3.55032
New Zealand	-3.23388	-3.40991	-3.05753
Nicaragua	-0.0163909	-0.407063	0.375814
Niger	0.440469	0.357719	0.523287
Nigeria	-0.944217	-1.18404	-0.703817
Niue	-2.06484	-2.46483	-1.66321
North Macedonia	0.139175	-0.253671	0.533568
Northern Mariana Islands	-1.8988	-2.04582	-1.75156
Norway	-4.13127	-4.35431	-3.90771
Oman	-1.4592	-1.64256	-1.2755
Pakistan	0.470547	0.0810836	0.861527
Palau	-1.82008	-1.8678	-1.77235
Palestine	-1.68365	-1.84412	-1.52291
Panama	-1.55853	-1.66576	-1.45117
Papua New Guinea	0.698596	0.508571	0.888981
Paraguay	-0.574219	-0.722738	-0.425478
Peru	-2.04306	-2.26846	-1.81714
Philippines	2.39571	1.88331	2.9107
Poland	-2.77377	-2.94784	-2.59937
Portugal	-4.15772	-4.36963	-3.94533
Puerto Rico	-3.28684	-3.43748	-3.13595
Qatar	-1.27966	-1.61101	-0.947192
Republic of Korea	-5.45847	-5.62068	-5.29598
Republic of Moldova	-0.230388	-0.626135	0.166935
Romania	-1.63479	-1.94401	-1.3246
Russian Federation	-0.776572	-1.47482	-0.0733723
Rwanda	-2.80028	-3.06814	-2.53167
Saint Kitts and Nevis	-2.60746	-2.75988	-2.4548
Saint Lucia	-2.89547	-3.20308	-2.5869
Saint Vincent and the Grenadines	-1.19843	-1.41361	-0.982787
Samoa	-0.896428	-0.918254	-0.874597
San Marino	-1.51302	-1.57724	-1.44877
Sao Tome and Principe	0.59597	0.381935	0.81046
Saudi Arabia	-1.15106	-1.46017	-0.840979
Senegal	-0.297903	-0.451301	-0.14427
Serbia	-0.382324	-0.765787	0.00262109
Seychelles	-1.86985	-2.01477	-1.72471
Sierra Leone	0.575978	0.347125	0.805352
Singapore	-4.12935	-4.28867	-3.96976
Slovakia	-1.81481	-2.08948	-1.53936
Slovenia	-2.92628	-3.0977	-2.75456
Solomon Islands	-0.0736558	-0.15249	0.00524006
Somalia	-0.4051	-0.448614	-0.361568
South Africa	0.29364	-0.32386	0.914966
South Sudan	-0.750045	-0.80806	-0.691995
Spain	-2.85752	-3.04359	-2.6711
Sri Lanka	-1.17235	-1.52763	-0.815795
Sudan	-0.924761	-1.00313	-0.846331
Suriname	-1.50212	-1.83763	-1.16546
Sweden	-2.67875	-2.79553	-2.56182
Switzerland	-2.50161	-2.6807	-2.32218
Syrian Arab Republic	-1.10172	-1.30062	-0.902421
Taiwan (Province of China)	-3.10154	-3.23526	-2.96762
Tajikistan	2.22288	1.902	2.54477
Thailand	-2.4279	-2.63648	-2.21888
Timor-Leste	1.25855	1.18034	1.33682
Togo	0.105366	-0.0955631	0.3067
Tokelau	-1.63677	-2.05629	-1.21546
Tonga	-1.27293	-1.50116	-1.04418
Trinidad and Tobago	-3.57572	-3.8346	-3.31614
Tunisia	-1.1872	-1.37299	-1.00105
Turkey	-2.24318	-2.43504	-2.05093
Turkmenistan	-0.567382	-1.0361	-0.0964457
Tuvalu	-1.30717	-1.40385	-1.2104
Uganda	-0.964503	-1.27553	-0.652499
Ukraine	-0.238321	-0.711051	0.236659
United Arab Emirates	-2.76309	-3.39094	-2.13115
United Kingdom	-4.4128	-4.61677	-4.20839
United Republic of Tanzania	-0.844829	-0.917779	-0.771824
United States of America	-3.15376	-3.27792	-3.02944
United States Virgin Islands	-0.794458	-0.985312	-0.603237
Uruguay	-1.25742	-1.44659	-1.06788
Uzbekistan	2.519	1.76612	3.27744
Vanuatu	-0.288738	-0.380196	-0.197196
Venezuela (Bolivarian Republic of)	-0.776228	-0.969436	-0.582645
Viet Nam	-0.189545	-0.335836	-0.043038
Yemen	-0.502377	-0.580858	-0.423833
Zambia	-0.655952	-0.910783	-0.400465
Zimbabwe	0.719795	0.483182	0.956966

## Sheet: Table 6
Table 6 EAPC of ASDR attributable to lead exposure in 2019 by countries
location_name	EAPC of ASDR	lower	upper
Afghanistan	-0.713035	-1.01916	-0.405966
Albania	-0.797863	-0.981609	-0.613777
Algeria	-2.44216	-2.50793	-2.37635
American Samoa	-1.08469	-1.12884	-1.04053
Andorra	-1.89925	-2.0116	-1.78676
Angola	-1.2997	-1.52791	-1.07096
Antigua and Barbuda	-2.00339	-2.17015	-1.83633
Argentina	-2.14781	-2.22159	-2.07398
Armenia	-1.66146	-1.94983	-1.37224
Australia	-4.10055	-4.21371	-3.98725
Austria	-3.37683	-3.54427	-3.20911
Azerbaijan	0.234474	-0.118253	0.588448
Bahamas	-1.76972	-1.9173	-1.62191
Bahrain	-3.94	-4.20924	-3.67
Bangladesh	-1.26963	-1.67576	-0.861834
Barbados	-2.66258	-2.80046	-2.52451
Belarus	-0.388795	-1.05575	0.282655
Belgium	-3.44904	-3.60067	-3.29717
Belize	-2.06707	-2.50388	-1.6283
Benin	-0.357129	-0.547986	-0.165905
Bermuda	-4.04643	-4.15524	-3.9375
Bhutan	-1.61088	-1.7329	-1.4887
Bolivia (Plurinational State of)	-1.25035	-1.32804	-1.17261
Bosnia and Herzegovina	-1.98606	-2.16841	-1.80338
Botswana	-1.80077	-2.34606	-1.25243
Brazil	-3.1244	-3.21393	-3.03479
Brunei Darussalam	-3.25988	-3.37906	-3.14055
Bulgaria	-1.67189	-2.11106	-1.23076
Burkina Faso	0.685157	0.506327	0.864305
Burundi	-1.98316	-2.08586	-1.88035
Cabo Verde	-1.22304	-1.48038	-0.965013
Cambodia	-1.10476	-1.26446	-0.944799
Cameroon	0.320174	-0.0588503	0.700636
Canada	-3.01587	-3.20759	-2.82378
Central African Republic	-0.22324	-0.328283	-0.118087
Chad	0.604658	0.319785	0.89034
Chile	-2.4708	-2.51984	-2.42174
China	-1.72297	-1.86886	-1.57687
Colombia	-3.98395	-4.13222	-3.83545
Comoros	-2.25546	-2.38139	-2.12937
Congo	-2.0583	-2.2054	-1.91099
Cook Islands	-2.69325	-2.81288	-2.57346
Costa Rica	-2.08605	-2.27825	-1.89347
Croatia	-2.36174	-2.62341	-2.09937
Cuba	-1.86002	-1.98544	-1.73444
Cyprus	-3.80157	-4.07848	-3.52386
Czechia	-3.64461	-3.79523	-3.49376
C么te d'Ivoire	-0.756496	-1.06311	-0.448929
Democratic People's Republic of Korea	0.642633	0.397932	0.887931
Democratic Republic of the Congo	-0.0433115	-0.23853	0.152289
Denmark	-4.51663	-4.7012	-4.3317
Djibouti	-1.4833	-1.66746	-1.29879
Dominica	-1.80349	-1.87965	-1.72726
Dominican Republic	0.65864	0.480365	0.837232
Ecuador	-0.839153	-1.07022	-0.607545
Egypt	-0.591028	-0.71792	-0.463973
El Salvador	-1.2127	-1.36939	-1.05576
Equatorial Guinea	-3.70455	-3.98996	-3.4183
Eritrea	-1.98677	-2.11116	-1.86223
Estonia	-2.15602	-2.51266	-1.79808
Eswatini	-0.226487	-0.798012	0.348331
Ethiopia	-2.90278	-3.05129	-2.75405
Fiji	-1.98637	-2.12382	-1.84872
Finland	-3.12488	-3.1656	-3.08415
France	-3.60401	-3.79104	-3.41662
Gabon	-1.81219	-2.03667	-1.5872
Gambia	0.12608	-0.0668451	0.319377
Georgia	-0.801526	-1.12914	-0.472823
Germany	-3.19953	-3.28753	-3.11146
Ghana	-0.344312	-0.605856	-0.0820788
Greece	-2.41335	-2.62901	-2.19721
Greenland	-2.62948	-2.84753	-2.41093
Grenada	-2.38788	-2.50488	-2.27074
Guam	-2.7054	-2.94625	-2.46396
Guatemala	-1.59126	-1.82507	-1.3569
Guinea	0.811082	0.614293	1.00826
Guinea-Bissau	-0.210706	-0.420765	-0.000203253
Guyana	-1.77625	-1.87092	-1.68149
Haiti	-0.910181	-0.982248	-0.838062
Honduras	0.341978	0.151395	0.532924
Hungary	-2.67171	-2.81129	-2.53193
Iceland	-4.19385	-4.35657	-4.03086
India	-1.13882	-1.27424	-1.00322
Indonesia	-0.530422	-0.725477	-0.334983
Iran (Islamic Republic of)	-2.5454	-2.75541	-2.33494
Iraq	-1.46788	-1.68118	-1.25411
Ireland	-5.04613	-5.26086	-4.8309
Israel	-4.45338	-4.57745	-4.32915
Italy	-3.43942	-3.55608	-3.32263
Jamaica	-1.22475	-1.53216	-0.916371
Japan	-4.12134	-4.14686	-4.09581
Jordan	-2.90621	-3.13959	-2.67228
Kazakhstan	-1.51471	-2.3142	-0.708685
Kenya	-0.987843	-1.2798	-0.695026
Kiribati	-0.492399	-0.587928	-0.396778
Kuwait	-2.33113	-2.81771	-1.84211
Kyrgyzstan	0.0622244	-0.453394	0.580513
Lao People's Democratic Republic	-1.28428	-1.55255	-1.01527
Latvia	-1.99842	-2.47363	-1.5209
Lebanon	-2.24207	-2.36675	-2.11722
Lesotho	1.12309	0.745628	1.50197
Liberia	-0.179819	-0.377562	0.018317
Libya	-1.76061	-1.91021	-1.61079
Lithuania	-1.39705	-1.80493	-0.987462
Luxembourg	-4.55702	-4.76396	-4.34962
Madagascar	-1.08363	-1.29077	-0.87606
Malawi	-1.19864	-1.52726	-0.86893
Malaysia	-1.83713	-2.076	-1.59768
Maldives	-4.08303	-4.27784	-3.88781
Mali	-0.210014	-0.265483	-0.154514
Malta	-3.10158	-3.22283	-2.98017
Marshall Islands	-1.139	-1.27368	-1.00413
Mauritania	-1.68874	-1.75232	-1.62512
Mauritius	-3.44329	-3.73224	-3.15348
Mexico	-0.744836	-0.839593	-0.649988
Micronesia (Federated States of)	-1.39071	-1.45202	-1.32935
Monaco	-3.03791	-3.1558	-2.91989
Mongolia	-1.80762	-2.33162	-1.2808
Montenegro	0.0306687	-0.374031	0.437013
Morocco	-1.26339	-1.35062	-1.17608
Mozambique	0.163348	-0.0327369	0.359816
Myanmar	-2.23146	-2.49217	-1.97005
Namibia	-1.30219	-1.71101	-0.891662
Nauru	-0.195678	-0.678277	0.289266
Nepal	-0.525327	-0.603285	-0.447308
Netherlands	-4.51919	-4.80302	-4.23452
New Zealand	-3.73177	-3.88314	-3.58016
Nicaragua	-0.844969	-1.15162	-0.537362
Niger	0.0515913	-0.0403201	0.143587
Nigeria	-1.44058	-1.70866	-1.17176
Niue	-1.94432	-2.17094	-1.71718
North Macedonia	-0.754718	-1.10633	-0.40186
Northern Mariana Islands	-1.58411	-1.73818	-1.4298
Norway	-4.46577	-4.6364	-4.29483
Oman	-2.40417	-2.66685	-2.14078
Pakistan	0.126804	-0.263177	0.518309
Palau	-1.71926	-1.76457	-1.67393
Palestine	-2.12767	-2.2837	-1.97139
Panama	-1.90628	-2.02016	-1.79226
Papua New Guinea	0.0783295	-0.119157	0.276207
Paraguay	-1.05383	-1.20507	-0.902357
Peru	-2.4312	-2.61858	-2.24345
Philippines	1.71198	1.20311	2.2234
Poland	-3.3064	-3.49184	-3.12059
Portugal	-4.47966	-4.67455	-4.28436
Puerto Rico	-3.38549	-3.55309	-3.21759
Qatar	-2.31756	-2.66966	-1.96419
Republic of Korea	-6.32263	-6.45035	-6.19474
Republic of Moldova	-0.251295	-0.74824	0.248139
Romania	-2.11744	-2.4818	-1.75173
Russian Federation	-1.09438	-1.86169	-0.321067
Rwanda	-3.54847	-3.85426	-3.2417
Saint Kitts and Nevis	-3.45975	-3.64324	-3.27592
Saint Lucia	-3.20243	-3.44248	-2.96178
Saint Vincent and the Grenadines	-1.84241	-2.00131	-1.68325
Samoa	-0.99194	-1.0124	-0.971478
San Marino	-2.03395	-2.07894	-1.98894
Sao Tome and Principe	-0.0614401	-0.336141	0.214019
Saudi Arabia	-1.46139	-1.80435	-1.11724
Senegal	-0.746089	-0.903026	-0.588904
Serbia	-1.3076	-1.72407	-0.889357
Seychelles	-2.39439	-2.53699	-2.25159
Sierra Leone	0.260578	0.00930983	0.512478
Singapore	-4.83621	-4.98885	-4.68332
Slovakia	-2.59807	-2.89832	-2.2969
Slovenia	-3.38545	-3.60782	-3.16257
Solomon Islands	-0.215197	-0.297755	-0.132569
Somalia	-0.642514	-0.698301	-0.586696
South Africa	-0.489883	-1.07558	0.0992849
South Sudan	-1.23442	-1.29917	-1.16961
Spain	-2.97214	-3.12458	-2.81947
Sri Lanka	-1.74012	-2.05838	-1.42081
Sudan	-1.48849	-1.58874	-1.38814
Suriname	-1.95754	-2.27506	-1.63898
Sweden	-2.96869	-3.09892	-2.83829
Switzerland	-3.04386	-3.18011	-2.90742
Syrian Arab Republic	-1.83804	-2.02327	-1.65247
Taiwan (Province of China)	-3.25708	-3.33328	-3.18082
Tajikistan	1.21632	0.944452	1.48893
Thailand	-2.83445	-3.03619	-2.63228
Timor-Leste	0.307987	0.211479	0.404588
Togo	-0.243147	-0.475608	-0.0101421
Tokelau	-1.64957	-1.92083	-1.37756
Tonga	-1.18948	-1.33896	-1.03978
Trinidad and Tobago	-3.74919	-4.02729	-3.47028
Tunisia	-1.76103	-1.93097	-1.5908
Turkey	-3.13665	-3.25461	-3.01855
Turkmenistan	-0.960753	-1.47956	-0.43921
Tuvalu	-1.42711	-1.46579	-1.38842
Uganda	-1.43827	-1.79208	-1.08319
Ukraine	-0.417525	-0.949099	0.116901
United Arab Emirates	-3.16035	-3.67853	-2.63939
United Kingdom	-4.71442	-4.88088	-4.54767
United Republic of Tanzania	-1.41759	-1.52008	-1.315
United States of America	-3.46683	-3.55785	-3.37571
United States Virgin Islands	-1.4203	-1.6202	-1.22001
Uruguay	-1.88297	-2.07613	-1.68943
Uzbekistan	1.40777	0.711584	2.10877
Vanuatu	-0.371445	-0.465225	-0.277577
Venezuela (Bolivarian Republic of)	-1.10427	-1.30653	-0.901591
Viet Nam	-0.946653	-1.10107	-0.791994
Yemen	-1.03135	-1.12157	-0.941051
Zambia	-1.17125	-1.49261	-0.84885
Zimbabwe	0.530286	0.246546	0.814829

## Sheet: Table 7
Table 7 ASMR attributable to lead exposure between 1990 and 2019 by gender
year	male			female
	ASMR	lower	upper	ASMR	lower	upper
1990	20.5177	12.839	28.8361	9.82824	4.86906	15.6553
1991	20.5328	13.011	29.0416	9.806	4.94368	15.7558
1992	20.5244	12.9571	28.8426	9.83584	5.04084	15.6143
1993	20.6057	13.1645	28.7869	9.83936	5.01146	15.7321
1994	20.5739	13.2609	28.8343	9.76173	5.07082	15.4207
1995	20.5366	13.2572	28.7306	9.66327	5.00987	15.327
1996	20.5432	13.3195	28.3444	9.66011	5.0121	15.2743
1997	20.6469	13.3768	28.6151	9.70556	5.07094	15.18
1998	20.5578	13.4231	28.2677	9.67695	5.12982	15.0273
1999	20.3499	13.2668	28.1066	9.64907	5.08667	14.9219
2000	20.3707	13.3901	28.1535	9.63118	5.09732	14.9022
2001	20.3724	13.4231	28.0622	9.65105	5.17003	14.7971
2002	20.4011	13.4038	27.9463	9.69419	5.187	14.8476
2003	20.289	13.3737	27.8719	9.59664	5.2006	14.8297
2004	19.9324	13.0981	27.3097	9.37268	5.06694	14.3667
2005	19.7783	12.9893	27.1973	9.29376	5.06891	14.2595
2006	19.3964	12.8112	26.4184	9.17649	5.00415	13.9366
2007	19.1639	12.7204	26.0931	9.0421	5.02033	13.697
2008	19.1389	12.5831	26.1413	8.9543	4.90399	13.5861
2009	18.9304	12.6133	25.6761	8.78246	4.8559	13.4146
2010	18.7861	12.3857	25.6861	8.69992	4.81348	13.2256
2011	18.5253	12.158	25.2243	8.64303	4.82135	13.3199
2012	18.2278	12.0276	24.5683	8.52968	4.7368	12.9279
2013	18.0087	11.9032	24.5707	8.45177	4.70289	12.7971
2014	17.6274	11.5742	24.1599	8.36006	4.58756	12.709
2015	17.2959	11.2286	23.7558	8.29207	4.64707	12.6505
2016	16.9751	11.0434	23.4855	8.18401	4.57318	12.444
2017	16.6179	10.7326	22.94	8.05918	4.53916	12.1477
2018	16.3247	10.6733	22.6274	7.9778	4.3914	12.2297
2019	16.0517	10.2551	21.9556	7.87662	4.28926	12.1482

## Sheet: Table 8
Table 8 ASDR attributable to lead exposure between 1990 and 2019 by gender
year	male			female
	ASDR	lower	upper	ASDR	lower	upper
1990	512.871	339.342	692.872	260.523	150.5	383.119
1991	512.11	341.622	692.169	259.418	153.794	381.286
1992	510.341	337.437	687.549	259.828	153.067	380.836
1993	510.272	344.118	690.698	258.793	153.588	377.448
1994	508.353	342.83	680.976	257.004	152.1	377.021
1995	505.541	335.884	675.266	254.203	150.215	373.836
1996	504.229	340.243	678.923	253.76	150.082	370.323
1997	505.19	344.568	675.075	254.343	151.964	369.012
1998	500.63	339.657	665.814	252.629	151.811	366.09
1999	494.506	332.932	662.361	250.383	151.252	366.234
2000	493.362	333.766	659.457	248.5	148.751	360.661
2001	490.529	337.221	653.639	247.499	149.63	357.429
2002	488.351	329.63	650.201	247.015	148.482	358.628
2003	483.369	328.667	648.703	243.724	148.861	354.064
2004	473.478	319.666	635.255	238.051	143.868	345.931
2005	467.993	319.324	624.038	234.915	143.933	339.148
2006	459.173	312.067	613.162	231.426	141.901	335.406
2007	452.96	307.74	602.006	227.51	138.982	329.213
2008	449.762	303.971	600.59	224.045	138.343	321.113
2009	442.613	301.003	591.385	219.314	133.492	315.285
2010	437.505	297.392	585.283	216.768	132.442	312.137
2011	430.616	290.552	575.211	214.407	131.861	308.419
2012	422.53	288.199	569.413	211.187	130.293	301.574
2013	412.528	278.611	551.358	207.846	128.481	299.779
2014	400.208	268.357	539.937	204.564	125.071	291.734
2015	392.356	260.636	532.146	202.815	124.192	290.034
2016	384.388	258.538	526.61	199.502	121.652	285.817
2017	374.976	248.033	517.38	195.594	120.352	280.628
2018	365.837	243.791	506.937	192.219	116.613	278.634
2019	357.558	233.384	493.304	188.847	113.072	274.638

## Sheet: Table 9
Table 9 Deaths attributable to lead exposure between 1990 and 2019 by age
age_name	year	deaths	lower	upper
25 to 29	1990	3087.03	1094.94	5844.15
30 to 34	1990	5291.69	2356.36	9066.73
35 to 39	1990	9320.86	4828.68	14569.5
40 to 44	1990	14946.9	8430.93	22465.8
45 to 49	1990	22823.6	13676	32976.9
50 to 54	1990	37652.8	23417.3	52928.4
55 to 59	1990	52461.8	33644.2	73112.4
60 to 64	1990	68092.6	43454	95589.1
65 to 69	1990	71689.4	44371.3	102270
70 to 74	1990	71600.6	42805.6	104885
75 to 79	1990	70847.3	39232.7	107224
<1 year	1990	0	0	0
80 to 84	1990	52066.1	25685.2	83594.5
85 to 89	1990	32139.1	15196.2	52935.2
90 to 94	1990	13126.1	5861.41	22201.3
95 plus	1990	4695.32	2030.43	7965.76
25 to 29	1991	3095.66	1069.86	5943.47
30 to 34	1991	5316.46	2355.26	9162.62
35 to 39	1991	9239.36	4756.32	14722.3
40 to 44	1991	15264.8	8490.09	23091.1
45 to 49	1991	23125.2	13945.3	33393.8
50 to 54	1991	37286.9	23228.9	52649.6
55 to 59	1991	53038	34555.2	73218.7
60 to 64	1991	69501	44647.5	97564.9
65 to 69	1991	73883.8	46039.5	105223
70 to 74	1991	74334.4	44561.8	108705
75 to 79	1991	72201.8	41101.4	109870
<1 year	1991	0	0	0
80 to 84	1991	53849.1	27142.1	87293.8
85 to 89	1991	33709	16004.3	54945.8
90 to 94	1991	13915.1	6197.23	23375.6
95 plus	1991	4886.22	2120.42	8287.49
25 to 29	1992	3104.87	1039.6	5914.14
30 to 34	1992	5358.37	2347.3	9197.03
35 to 39	1992	9246.37	4668.16	14663.8
40 to 44	1992	15657.9	8679.36	23546.6
45 to 49	1992	23547.7	14041.7	33813.8
50 to 54	1992	37151	23144.9	52149.7
55 to 59	1992	53429.3	34469.9	73914.2
60 to 64	1992	70805.8	45915.9	98037.4
65 to 69	1992	76114.6	47680.8	107949
70 to 74	1992	77146.5	46631.6	112884
75 to 79	1992	73530.3	42420.9	110722
<1 year	1992	0	0	0
80 to 84	1992	55630.1	28297.2	89724.8
85 to 89	1992	35394.1	17000.6	57545.1
90 to 94	1992	14733.5	6640.27	24604.3
95 plus	1992	5128.16	2253.95	8675.37
25 to 29	1993	3067.15	1045.07	5919.03
30 to 34	1993	5441.01	2402.3	9447.15
35 to 39	1993	9174.97	4641.3	14762.1
40 to 44	1993	16067.9	8945.77	24512.7
45 to 49	1993	23902.4	14483.1	34800.4
50 to 54	1993	37063.5	22992.8	52609.6
55 to 59	1993	53632.2	34583.5	74976.4
60 to 64	1993	71846.4	46687.3	100350
65 to 69	1993	78467.6	49336.1	111721
70 to 74	1993	80135	48898.4	116317
75 to 79	1993	74922.1	43924	111004
<1 year	1993	0	0	0
80 to 84	1993	57683.1	29692	92483.5
85 to 89	1993	37179.7	18163	60074.2
90 to 94	1993	15833.4	7166.55	26368
95 plus	1993	5431.21	2396.72	9165.4
25 to 29	1994	3128.61	1017.05	6106.11
30 to 34	1994	5680.12	2468.05	9751.23
35 to 39	1994	9176.3	4633.55	14783.3
40 to 44	1994	16505.2	9128.81	25119.9
45 to 49	1994	24622.5	14617.5	35761.9
50 to 54	1994	37146.7	23374.8	52047.1
55 to 59	1994	53169.4	34501.9	74217.6
60 to 64	1994	72332.9	47484.3	101321
65 to 69	1994	80251.9	50816.9	115363
70 to 74	1994	82653	50388.9	120460
75 to 79	1994	75651.9	44758.1	112985
<1 year	1994	0	0	0
80 to 84	1994	59014.9	30186.7	93870.1
85 to 89	1994	38659.4	18813.3	62358.4
90 to 94	1994	16877.3	7750.78	28168.4
95 plus	1994	5729.14	2533.91	9649.69
25 to 29	1995	3122.27	985.916	6185.46
30 to 34	1995	5858.96	2532.54	10129
35 to 39	1995	9076.41	4538.69	14567
40 to 44	1995	16926.4	9323.93	25603
45 to 49	1995	24913.5	14687	35996.6
50 to 54	1995	37010.3	23229.6	51657.8
55 to 59	1995	52565.3	33818.8	72863
60 to 64	1995	72247	47454	100524
65 to 69	1995	81850	52131.5	116595
70 to 74	1995	85011.2	51305.5	123067
75 to 79	1995	77574.7	46440.1	114215
<1 year	1995	0	0	0
80 to 84	1995	60308.4	31390.8	95677.2
85 to 89	1995	40271.5	19735	64593
90 to 94	1995	17909.2	8279.83	29730.1
95 plus	1995	6089.39	2712.41	10216.4
25 to 29	1996	3048.24	946.377	6075.18
30 to 34	1996	5951.91	2561.47	10370.5
35 to 39	1996	8876.1	4405.42	14345.5
40 to 44	1996	17041.7	9457.49	26011.6
45 to 49	1996	25913.3	15400.1	37890.8
50 to 54	1996	37976.2	24208.8	52994.7
55 to 59	1996	52379.6	33998.5	72636.5
60 to 64	1996	73005	48337.6	101284
65 to 69	1996	83678.1	53403.6	119341
70 to 74	1996	87620	53496.7	127106
75 to 79	1996	80578.7	48488.2	119017
<1 year	1996	0	0	0
80 to 84	1996	61636.6	32463.7	97076.6
85 to 89	1996	41876	20804.4	66589.4
90 to 94	1996	18820.7	8802.6	31107.3
95 plus	1996	6512.54	2916.24	10893.4
25 to 29	1997	2994.49	893.797	6033.01
30 to 34	1997	6044.04	2598.4	10563
35 to 39	1997	9040.76	4504.88	14526
40 to 44	1997	17148.3	9472.12	26186.1
45 to 49	1997	26599.5	15819.3	38819.3
50 to 54	1997	38985.3	24718.5	54317.7
55 to 59	1997	52582.3	33835.1	72689.4
60 to 64	1997	74678.3	49366	103120
65 to 69	1997	86303.8	55521	122047
70 to 74	1997	91305.4	56684.4	131674
75 to 79	1997	84360.1	51052.7	123079
<1 year	1997	0	0	0
80 to 84	1997	63038.4	33781.6	98411.9
85 to 89	1997	43475.8	21976	69082.5
90 to 94	1997	19721.7	9343.16	32379.4
95 plus	1997	6895.05	3110.49	11487.1
25 to 29	1998	2934.86	842.156	6023.68
30 to 34	1998	6038.59	2523.03	10558
35 to 39	1998	9383.33	4670.12	15063.5
40 to 44	1998	16852.5	9188.97	25528.4
45 to 49	1998	26862.1	15795.9	38820.6
50 to 54	1998	38815.2	24484.2	53980.7
55 to 59	1998	52105.6	33653.3	71517.7
60 to 64	1998	74836.7	49642.7	103597
65 to 69	1998	87706.5	56576.7	123350
70 to 74	1998	94420.3	58489.4	135006
75 to 79	1998	87841.5	53354.1	127315
<1 year	1998	0	0	0
80 to 84	1998	64321.6	35353.5	99037.6
85 to 89	1998	45334.6	23051.3	71601.2
90 to 94	1998	20612.2	9832.22	33755.6
95 plus	1998	7340.23	3343.22	12180.3
25 to 29	1999	2890.6	801.645	6007.49
30 to 34	1999	6015.32	2487.41	10628.7
35 to 39	1999	9796.79	4869.2	15668.5
40 to 44	1999	16527.5	8945.4	25327.8
45 to 49	1999	27564.3	16250.3	40341.1
50 to 54	1999	39229.7	24706.1	55012.7
55 to 59	1999	52119.5	34013.1	71281.5
60 to 64	1999	72975.1	48302.5	100890
65 to 69	1999	87816.7	56865.3	122969
70 to 74	1999	96972.8	60092.4	138634
75 to 79	1999	91220.4	55303.9	132137
<1 year	1999	0	0	0
80 to 84	1999	65963.6	36690.1	101541
85 to 89	1999	47315	24262.8	74308.6
90 to 94	1999	21552.5	10304.5	35200.6
95 plus	1999	7812.65	3574.65	12885
25 to 29	2000	2793.52	741.501	5879.04
30 to 34	2000	5950.77	2422.46	10564.7
35 to 39	2000	10012.5	4951.13	16099
40 to 44	2000	16359.8	8789.22	25186
45 to 49	2000	28350.3	16768.5	41522
50 to 54	2000	39648.5	24460.8	56259.8
55 to 59	2000	52344.9	34059.1	72134.1
60 to 64	2000	72408.2	47519.6	100917
65 to 69	2000	89447.2	57861.2	124773
70 to 74	2000	100968	63283.1	144176
75 to 79	2000	95444.3	58548.7	138740
<1 year	2000	0	0	0
80 to 84	2000	68782.5	38577.9	105803
85 to 89	2000	48969.9	25591	77451.7
90 to 94	2000	22398.1	10809.7	36628.8
95 plus	2000	8253.79	3803.29	13570.2
25 to 29	2001	2634.63	678.492	5605.52
30 to 34	2001	5752.64	2268.58	10415
35 to 39	2001	10118.4	4930.04	16427.3
40 to 44	2001	16273.5	8711.43	25221.2
45 to 49	2001	28035	16382.7	41436.2
50 to 54	2001	40920.4	25396.2	58507
55 to 59	2001	52643.4	34548.1	72384.6
60 to 64	2001	72188.1	47250.2	99954.3
65 to 69	2001	91138.9	59141.3	126229
70 to 74	2001	104591	65632.2	148588
75 to 79	2001	99549.7	61358.6	142624
<1 year	2001	0	0	0
80 to 84	2001	72559.9	41323.7	109504
85 to 89	2001	50605.7	26787.3	79086.5
90 to 94	2001	23389.6	11450.6	38048.1
95 plus	2001	8733.71	4068.56	14328.2
25 to 29	2002	2446.34	600.276	5294.21
30 to 34	2002	5380.83	2046.4	9867.44
35 to 39	2002	10202.5	4962.31	16358
40 to 44	2002	16390.8	8669.85	25401.2
45 to 49	2002	27769.5	16075.4	40893.7
50 to 54	2002	42038.6	25986.4	59430.4
55 to 59	2002	53961.4	35055	73967
60 to 64	2002	72752.8	47397.3	100634
65 to 69	2002	92909.9	60762.1	129807
70 to 74	2002	107289	67768.8	152334
75 to 79	2002	103939	64852.2	148633
<1 year	2002	0	0	0
80 to 84	2002	76725.9	43585.3	115659
85 to 89	2002	52165.6	28092.9	79926.6
90 to 94	2002	24486.1	12025.2	39597
95 plus	2002	9264.82	4312.98	15186
25 to 29	2003	2252.35	528.648	4901.94
30 to 34	2003	5089.76	1878.37	9412.63
35 to 39	2003	9754.59	4651.82	15939.9
40 to 44	2003	16565.9	8774.94	25725.5
45 to 49	2003	27006.5	15609.3	39953
50 to 54	2003	42863.4	26432.2	61340.5
55 to 59	2003	54811.9	35926.2	75400.1
60 to 64	2003	73431.5	48574.7	101533
65 to 69	2003	93595.7	60717.7	130502
70 to 74	2003	108525	68862.7	152803
75 to 79	2003	107460	67107.2	153742
<1 year	2003	0	0	0
80 to 84	2003	80140.6	45618.8	122202
85 to 89	2003	53151.3	29071.9	82142.2
90 to 94	2003	25482	12700.2	41225.5
95 plus	2003	9731.69	4550.88	15975
25 to 29	2004	2144.4	478.231	4739.22
30 to 34	2004	4932.78	1785.62	9172.97
35 to 39	2004	9400.24	4362.56	15569.6
40 to 44	2004	16758.7	8809.19	26223.5
45 to 49	2004	26409	14962.2	39285.4
50 to 54	2004	42764.5	26092.2	61929
55 to 59	2004	55218	35553.3	77080.5
60 to 64	2004	72504	47539.6	100451
65 to 69	2004	91929.3	59467.9	129626
70 to 74	2004	108226	69028.7	152580
75 to 79	2004	109865	68743.8	157845
<1 year	2004	0	0	0
80 to 84	2004	83137.5	47459	125505
85 to 89	2004	54201.3	29904.8	82745.1
90 to 94	2004	26229.8	13190.8	42237.9
95 plus	2004	10070.3	4706.26	16556.6
25 to 29	2005	2066.04	433.653	4640.26
30 to 34	2005	4652.84	1618.52	8783.89
35 to 39	2005	9246.9	4198.29	15237.8
40 to 44	2005	16920.2	8811.71	26534.9
45 to 49	2005	26026	14733.3	39103.8
50 to 54	2005	43741.9	26383.1	62978.6
55 to 59	2005	55858.7	35713.6	77789.8
60 to 64	2005	71950.7	47674.7	99375.7
65 to 69	2005	91980.4	59666.3	129765
70 to 74	2005	109715	70033.4	153677
75 to 79	2005	113611	71634.2	162250
<1 year	2005	0	0	0
80 to 84	2005	86814.1	49912.1	130568
85 to 89	2005	56728.6	31805.1	86939.1
90 to 94	2005	27251.6	13731.4	43695
95 plus	2005	10519.9	4913.39	17306.3
25 to 29	2006	1993.54	404.532	4553.47
30 to 34	2006	4437.57	1507.31	8532.25
35 to 39	2006	9106.87	4096.47	15234.5
40 to 44	2006	17296.9	8997.82	26981.9
45 to 49	2006	25671.8	14593.3	38571.2
50 to 54	2006	43370.3	26419.7	62327.5
55 to 59	2006	57181.9	36696.4	79790.7
60 to 64	2006	72625.3	48133	99315
65 to 69	2006	91243.5	59512.6	127472
70 to 74	2006	110234	71170	153173
75 to 79	2006	115496	73409.5	164179
<1 year	2006	0	0	0
80 to 84	2006	88979.4	51610.7	132374
85 to 89	2006	59080.1	33413.7	89768.4
90 to 94	2006	27795.8	14218.5	44318.3
95 plus	2006	10927.6	5098.58	18013.4
25 to 29	2007	1900.55	357.922	4373.9
30 to 34	2007	4268.22	1383.98	8281.12
35 to 39	2007	8874.49	3887.33	14788.3
40 to 44	2007	17639.5	9034.74	27575.2
45 to 49	2007	25821.6	14366.2	38614.5
50 to 54	2007	43474.9	25988	62216.6
55 to 59	2007	57928.8	36642.8	80760.9
60 to 64	2007	74990.9	49859.5	102339
65 to 69	2007	90371.9	58853.8	125367
70 to 74	2007	110632	70890.5	153133
75 to 79	2007	117162	74377.7	165335
<1 year	2007	0	0	0
80 to 84	2007	91934.9	53284.8	137683
85 to 89	2007	62207.4	35139.2	94194
90 to 94	2007	28503.1	14702.7	45391.5
95 plus	2007	11409.3	5357.47	18906.6
25 to 29	2008	1862.33	330.989	4365.28
30 to 34	2008	4161.2	1294.75	8136.8
35 to 39	2008	8708.67	3756.85	14690.3
40 to 44	2008	17482.5	8884.69	27509.3
45 to 49	2008	26526.6	14771.5	39635.7
50 to 54	2008	43052	25980.1	61741.8
55 to 59	2008	58689	37492.5	82149.8
60 to 64	2008	77105.9	51154.5	105106
65 to 69	2008	90923.2	59296.2	126031
70 to 74	2008	111831	72045.3	155928
75 to 79	2008	120458	76488.2	169472
<1 year	2008	0	0	0
80 to 84	2008	96521.1	56182.5	143971
85 to 89	2008	66271.2	37277.2	100928
90 to 94	2008	29473.3	15431.8	46450.3
95 plus	2008	12000.7	5655.99	19856.5
25 to 29	2009	1853.97	308.294	4390.07
30 to 34	2009	3968.3	1190.12	7952.06
35 to 39	2009	8298.31	3488.1	14131.7
40 to 44	2009	16582.3	8327	26080.3
45 to 49	2009	27430.8	15381.7	40943
50 to 54	2009	41718.8	24874.4	60065.8
55 to 59	2009	59139.9	37393.1	82085.8
60 to 64	2009	78749.7	52377.5	107653
65 to 69	2009	92171	60789.7	126798
70 to 74	2009	111611	72680.5	155724
75 to 79	2009	122092	78556.5	171133
<1 year	2009	0	0	0
80 to 84	2009	99783.2	57466	148575
85 to 89	2009	69797.1	38948.8	105999
90 to 94	2009	30369.7	15938.3	47859.2
95 plus	2009	12541.7	5970.47	20777.4
25 to 29	2010	1846.97	279.311	4458.32
30 to 34	2010	3792.43	1076.11	7751.91
35 to 39	2010	7940.34	3207.34	13762.2
40 to 44	2010	16060.3	7881.17	25427.7
45 to 49	2010	28300.1	15645.4	42183
50 to 54	2010	41251.6	24369.6	59451.6
55 to 59	2010	61277.6	38361.8	84788.1
60 to 64	2010	79716.4	52680.4	110032
65 to 69	2010	94135.7	61860.2	129114
70 to 74	2010	112023	72014.5	155380
75 to 79	2010	123740	79522.3	173150
<1 year	2010	0	0	0
80 to 84	2010	103712	60622.5	153170
85 to 89	2010	73284.2	41430.7	110998
90 to 94	2010	31915.9	16708	50009.1
95 plus	2010	13204.6	6293.75	21797.1
25 to 29	2011	1756.71	240.93	4352.82
30 to 34	2011	3633.14	986.293	7510.57
35 to 39	2011	7536.37	2936.68	13239.2
40 to 44	2011	15621.5	7477.99	24992.7
45 to 49	2011	28650.9	15699.5	42938.3
50 to 54	2011	41198.1	24415.4	59637.5
55 to 59	2011	61866.5	39014.2	86733
60 to 64	2011	82852.4	54349.9	114032
65 to 69	2011	95257.1	63028.1	130832
70 to 74	2011	112332	72406.6	156653
75 to 79	2011	125915	81507.4	176244
<1 year	2011	0	0	0
80 to 84	2011	106513	63299.4	159406
85 to 89	2011	76468.5	43700.8	116511
90 to 94	2011	33808	17830.3	53342
95 plus	2011	13728.9	6610.92	22632.4
25 to 29	2012	1616	198.079	4095.13
30 to 34	2012	3446.17	897.757	7236.84
35 to 39	2012	7087.16	2691.71	12660.2
40 to 44	2012	15134	7111.31	24327.2
45 to 49	2012	28719.1	15737.4	43260.1
50 to 54	2012	41525.4	24463.6	60270.1
55 to 59	2012	62484.4	39208.4	87189.8
60 to 64	2012	85007.7	55712.6	117121
65 to 69	2012	96190.3	63615.5	131915
70 to 74	2012	112701	73385.4	156692
75 to 79	2012	127535	82390	178246
<1 year	2012	0	0	0
80 to 84	2012	108428	63948.8	161236
85 to 89	2012	79766.7	45441.4	121168
90 to 94	2012	35676	18614.2	56479.3
95 plus	2012	14190.1	6863.52	23470.2
25 to 29	2013	1523.81	167.505	3939.31
30 to 34	2013	3299.57	806.996	6998.34
35 to 39	2013	6776.02	2479.94	12128.9
40 to 44	2013	14641	6780.19	23810.8
45 to 49	2013	28159.3	15375.7	42332.4
50 to 54	2013	42460.3	25015.7	61169.5
55 to 59	2013	61130.7	37955.9	85428.2
60 to 64	2013	84777.2	54925.8	117288
65 to 69	2013	95302.1	62071.6	130928
70 to 74	2013	111634	72626.4	154507
75 to 79	2013	129847	84052.5	181494
<1 year	2013	0	0	0
80 to 84	2013	114639	67635.9	168499
85 to 89	2013	85492.4	48996.5	128810
90 to 94	2013	38350.2	20178	60410.1
95 plus	2013	14887.2	7286.4	24485.6
25 to 29	2014	1387.11	129.969	3709.18
30 to 34	2014	3121.64	705.483	6759.95
35 to 39	2014	6378.21	2224.2	11661.2
40 to 44	2014	13900.2	6252.97	22977.4
45 to 49	2014	26582.9	14180.1	40504.4
50 to 54	2014	43472.7	25529.1	62706
55 to 59	2014	60202.8	36900.5	84144.1
60 to 64	2014	84825.7	54919.4	117868
65 to 69	2014	95481.9	62371.7	133955
70 to 74	2014	109019	70777.1	152457
75 to 79	2014	130786	84305.9	183398
<1 year	2014	0	0	0
80 to 84	2014	121199	72792.2	179664
85 to 89	2014	89546.5	51121.8	134772
90 to 94	2014	40446.6	21124.4	63624.8
95 plus	2014	15578.6	7632.2	25768.1
25 to 29	2015	1285.1	111.056	3488.49
30 to 34	2015	2985.15	618.855	6537.65
35 to 39	2015	6086.51	2008.98	11336.4
40 to 44	2015	13067.4	5596.92	21781
45 to 49	2015	25828.1	13352.3	39559.1
50 to 54	2015	44485.5	25722.9	64926.9
55 to 59	2015	61349.8	37666.9	86549.3
60 to 64	2015	88361	56690.9	122297
65 to 69	2015	97459.6	63224.8	135362
70 to 74	2015	109469	71129.4	152575
75 to 79	2015	130974	84315.3	183491
<1 year	2015	0	0	0
80 to 84	2015	122730	72944.4	181709
85 to 89	2015	92168.9	53065.6	139327
90 to 94	2015	42224.3	22226.2	66707.8
95 plus	2015	16387.7	7997.3	27228.5
25 to 29	2016	1211.33	96.9013	3391.73
30 to 34	2016	2892.66	545.218	6542.17
35 to 39	2016	5848.54	1882.79	11044.6
40 to 44	2016	12595.6	5314.95	21299.6
45 to 49	2016	25124.1	12977.5	38888.2
50 to 54	2016	43978.3	25533.1	64859.8
55 to 59	2016	61250.8	37868.1	87504.6
60 to 64	2016	87996.7	56721.3	122275
65 to 69	2016	101212	65595.7	140453
70 to 74	2016	112373	73194.5	156230
75 to 79	2016	131104	83773	186025
<1 year	2016	0	0	0
80 to 84	2016	124822	73794.6	185397
85 to 89	2016	95014.7	54348.7	144249
90 to 94	2016	44092.4	23254.7	69583.2
95 plus	2016	17325.7	8455.16	28828.5
25 to 29	2017	1162.63	83.851	3288.46
30 to 34	2017	2821.58	489.169	6527
35 to 39	2017	5706.37	1719.83	11038.1
40 to 44	2017	12172	4911.89	20860.5
45 to 49	2017	24077.6	11961.7	37576.9
50 to 54	2017	43283.9	24771.6	63784.2
55 to 59	2017	60713.2	37143.9	86408.4
60 to 64	2017	86392.1	55291.9	120453
65 to 69	2017	102831	66020.9	143919
70 to 74	2017	115640	75735.3	161062
75 to 79	2017	131391	84157.9	185607
<1 year	2017	0	0	0
80 to 84	2017	128041	76293.9	187686
85 to 89	2017	97719	56298.8	147555
90 to 94	2017	46363.5	24592.6	73491.8
95 plus	2017	18397.9	9060.17	30525.7
25 to 29	2018	1138.48	77.0513	3275.92
30 to 34	2018	2761.27	445.04	6474.26
35 to 39	2018	5620.65	1664.83	10976.3
40 to 44	2018	11603.4	4593.35	20078.8
45 to 49	2018	22946.4	11250.6	36325.6
50 to 54	2018	42621.7	23970.3	63378.6
55 to 59	2018	60183.1	36508.1	86347.1
60 to 64	2018	84863.6	53464	118518
65 to 69	2018	104625	67247.7	145855
70 to 74	2018	117979	76657.9	165165
75 to 79	2018	132628	86201.6	187804
<1 year	2018	0	0	0
80 to 84	2018	131251	78443.7	196461
85 to 89	2018	101741	59163.4	154056
90 to 94	2018	49640.4	26385.7	77889.7
95 plus	2018	19624.2	9634.97	32249.9
25 to 29	2019	1088.51	63.6122	3171.34
30 to 34	2019	2663.17	392.76	6385.1
35 to 39	2019	5451.17	1494.31	10723
40 to 44	2019	11074.1	4109.02	19529.1
45 to 49	2019	22006.5	10341.3	35199
50 to 54	2019	41590.2	22918.4	62169.5
55 to 59	2019	60498.4	35736.2	86535.6
60 to 64	2019	83693	52024.2	117425
65 to 69	2019	106511	67278.4	149051
70 to 74	2019	122236	78615.8	171921
75 to 79	2019	133302	85397.4	186131
<1 year	2019	0	0	0
80 to 84	2019	132356	79315.4	196343
85 to 89	2019	105582	61179.1	159633
90 to 94	2019	52840	28174.6	82826.2
95 plus	2019	20823.8	10211.6	34339.4

## Sheet: Table 10
Table 10 DALYs attributable to lead exposure between 1990 and 2019 by age
age_name	year	DALYs	lower	upper
25 to 29	1990	420412	220459	659037
30 to 34	1990	489585	273892	754524
35 to 39	1990	651457	380131	967693
40 to 44	1990	843562	505156	1.21727e+06
45 to 49	1990	1.08564e+06	674364	1.53642e+06
50 to 54	1990	1.5289e+06	972872	2.13092e+06
55 to 59	1990	1.83824e+06	1.19362e+06	2.53101e+06
60 to 64	1990	2.03213e+06	1.30095e+06	2.8168e+06
65 to 69	1990	1.79673e+06	1.11778e+06	2.57127e+06
70 to 74	1990	1.46232e+06	880430	2.15024e+06
75 to 79	1990	1.14326e+06	642739	1.73192e+06
<1 year	1990	68650.2	27241.3	123779
80 to 84	1990	643700	320302	1.02648e+06
85 to 89	1990	302740	143985	495649
90 to 94	1990	95651.7	42773	160026
95 plus	1990	25950.2	11214.8	43903
25 to 29	1991	426147	224743	672183
30 to 34	1991	494157	277871	758156
35 to 39	1991	650642	380804	967866
40 to 44	1991	865462	520303	1.26075e+06
45 to 49	1991	1.1011e+06	691708	1.57273e+06
50 to 54	1991	1.51672e+06	969503	2.11763e+06
55 to 59	1991	1.85966e+06	1.22e+06	2.55807e+06
60 to 64	1991	2.07583e+06	1.36154e+06	2.89854e+06
65 to 69	1991	1.85285e+06	1.16844e+06	2.62768e+06
70 to 74	1991	1.51943e+06	917665	2.20561e+06
75 to 79	1991	1.16606e+06	667760	1.75683e+06
<1 year	1991	68657.5	27092.1	123644
80 to 84	1991	666077	338466	1.07092e+06
85 to 89	1991	317710	151104	514531
90 to 94	1991	101449	45188.2	169582
95 plus	1991	26985.3	11756.6	45667.8
25 to 29	1992	431247	228158	680806
30 to 34	1992	500630	280293	767053
35 to 39	1992	653977	382219	975460
40 to 44	1992	889668	525527	1.28425e+06
45 to 49	1992	1.12294e+06	699928	1.577e+06
50 to 54	1992	1.51279e+06	961232	2.1077e+06
55 to 59	1992	1.87485e+06	1.23801e+06	2.57589e+06
60 to 64	1992	2.11603e+06	1.36642e+06	2.92882e+06
65 to 69	1992	1.90995e+06	1.21374e+06	2.69702e+06
70 to 74	1992	1.57841e+06	960154	2.2891e+06
75 to 79	1992	1.18838e+06	688633	1.78416e+06
<1 year	1992	68656.7	27135	124164
80 to 84	1992	688405	351560	1.0991e+06
85 to 89	1992	333738	161224	537407
90 to 94	1992	107431	48460.7	178822
95 plus	1992	28307.9	12387.6	47798.4
25 to 29	1993	432409	228384	684372
30 to 34	1993	510639	285038	787849
35 to 39	1993	652704	379581	984464
40 to 44	1993	914841	547192	1.3437e+06
45 to 49	1993	1.14188e+06	707648	1.62494e+06
50 to 54	1993	1.51073e+06	965650	2.1154e+06
55 to 59	1993	1.88356e+06	1.24007e+06	2.60648e+06
60 to 64	1993	2.1486e+06	1.4036e+06	2.97387e+06
65 to 69	1993	1.97009e+06	1.25893e+06	2.79238e+06
70 to 74	1993	1.64104e+06	1.00949e+06	2.37531e+06
75 to 79	1993	1.21171e+06	714267	1.78933e+06
<1 year	1993	68562.4	27327	123688
80 to 84	1993	713911	368644	1.14287e+06
85 to 89	1993	350579	171538	563219
90 to 94	1993	115424	52327.2	191326
95 plus	1993	29986.9	13158.4	50559.5
25 to 29	1994	438773	229371	696338
30 to 34	1994	529953	295506	824080
35 to 39	1994	654941	379486	984704
40 to 44	1994	940739	562826	1.37185e+06
45 to 49	1994	1.17719e+06	730871	1.66989e+06
50 to 54	1994	1.51529e+06	971030	2.10087e+06
55 to 59	1994	1.87022e+06	1.22937e+06	2.59181e+06
60 to 64	1994	2.16563e+06	1.43223e+06	2.9829e+06
65 to 69	1994	2.0171e+06	1.28315e+06	2.86169e+06
70 to 74	1994	1.69488e+06	1.03051e+06	2.4407e+06
75 to 79	1994	1.22523e+06	728529	1.80211e+06
<1 year	1994	68429.4	27485.3	123289
80 to 84	1994	730898	376708	1.15297e+06
85 to 89	1994	364604	177594	586196
90 to 94	1994	123041	56339	203557
95 plus	1994	31627.3	14017.3	53141.7
25 to 29	1995	440295	227800	698226
30 to 34	1995	545699	302607	843878
35 to 39	1995	652159	373209	977499
40 to 44	1995	967414	575041	1.40778e+06
45 to 49	1995	1.1927e+06	725634	1.695e+06
50 to 54	1995	1.51176e+06	965921	2.08507e+06
55 to 59	1995	1.8522e+06	1.20916e+06	2.55364e+06
60 to 64	1995	2.1663e+06	1.43328e+06	2.97341e+06
65 to 69	1995	2.0595e+06	1.31652e+06	2.92309e+06
70 to 74	1995	1.7453e+06	1.064e+06	2.50936e+06
75 to 79	1995	1.25784e+06	758085	1.84573e+06
<1 year	1995	68337.3	27365.9	123166
80 to 84	1995	747441	390371	1.17826e+06
85 to 89	1995	379833	187513	605826
90 to 94	1995	130580	60316.9	214018
95 plus	1995	33620.4	15065.5	56244.2
25 to 29	1996	437081	225131	699168
30 to 34	1996	555953	308349	859857
35 to 39	1996	644950	370380	971140
40 to 44	1996	975688	582201	1.43386e+06
45 to 49	1996	1.24122e+06	763643	1.7696e+06
50 to 54	1996	1.55038e+06	1.00859e+06	2.12786e+06
55 to 59	1996	1.84758e+06	1.20948e+06	2.54273e+06
60 to 64	1996	2.1907e+06	1.44931e+06	2.99626e+06
65 to 69	1996	2.10717e+06	1.35624e+06	2.98078e+06
70 to 74	1996	1.80035e+06	1.10315e+06	2.60012e+06
75 to 79	1996	1.30755e+06	790870	1.90582e+06
<1 year	1996	68209.2	27461.8	123382
80 to 84	1996	764387	404462	1.18609e+06
85 to 89	1996	395019	198128	626958
90 to 94	1996	137243	64044.4	224350
95 plus	1996	35947.2	16250.4	59994.5
25 to 29	1997	434435	224211	694321
30 to 34	1997	565264	310588	883007
35 to 39	1997	657610	376857	987108
40 to 44	1997	983416	586905	1.43433e+06
45 to 49	1997	1.27544e+06	781319	1.82042e+06
50 to 54	1997	1.59205e+06	1.02618e+06	2.19527e+06
55 to 59	1997	1.85518e+06	1.20794e+06	2.54765e+06
60 to 64	1997	2.24053e+06	1.48635e+06	3.06995e+06
65 to 69	1997	2.17317e+06	1.40711e+06	3.05617e+06
70 to 74	1997	1.8764e+06	1.16826e+06	2.68943e+06
75 to 79	1997	1.36969e+06	829666	1.9818e+06
<1 year	1997	68005.7	27329.1	122827
80 to 84	1997	782295	420878	1.21896e+06
85 to 89	1997	410218	208206	651089
90 to 94	1997	143837	67933.5	235051
95 plus	1997	38043	17400.7	63292.9
25 to 29	1998	430792	219228	693544
30 to 34	1998	567910	311829	880708
35 to 39	1998	680660	390958	1.01868e+06
40 to 44	1998	971618	567831	1.41557e+06
45 to 49	1998	1.29245e+06	787242	1.82849e+06
50 to 54	1998	1.59e+06	1.02444e+06	2.18397e+06
55 to 59	1998	1.84074e+06	1.21736e+06	2.51861e+06
60 to 64	1998	2.24767e+06	1.49568e+06	3.07834e+06
65 to 69	1998	2.20997e+06	1.42824e+06	3.09007e+06
70 to 74	1998	1.94166e+06	1.2095e+06	2.76849e+06
75 to 79	1998	1.42739e+06	868872	2.04804e+06
<1 year	1998	67647.4	27388	122791
80 to 84	1998	798782	439652	1.22347e+06
85 to 89	1998	427720	217994	671528
90 to 94	1998	150354	71811.5	243921
95 plus	1998	40479.9	18554.8	67126.5
25 to 29	1999	427263	215882	690306
30 to 34	1999	568695	307951	891000
35 to 39	1999	707949	401820	1.05992e+06
40 to 44	1999	957998	557508	1.40617e+06
45 to 49	1999	1.32716e+06	808512	1.89487e+06
50 to 54	1999	1.61107e+06	1.0291e+06	2.23713e+06
55 to 59	1999	1.84286e+06	1.20937e+06	2.51725e+06
60 to 64	1999	2.19815e+06	1.45286e+06	3.01406e+06
65 to 69	1999	2.21608e+06	1.44706e+06	3.09433e+06
70 to 74	1999	1.9961e+06	1.23958e+06	2.83693e+06
75 to 79	1999	1.48359e+06	899214	2.1299e+06
<1 year	1999	67161.4	27123.5	121239
80 to 84	1999	819545	457067	1.26163e+06
85 to 89	1999	446316	230087	695195
90 to 94	1999	157221	75408	254980
95 plus	1999	43067.2	19827.9	71236.1
25 to 29	2000	420281	211119	684222
30 to 34	2000	566501	306051	889391
35 to 39	2000	724358	411813	1.09349e+06
40 to 44	2000	951775	551329	1.4111e+06
45 to 49	2000	1.36682e+06	826165	1.96648e+06
50 to 54	2000	1.63013e+06	1.03348e+06	2.28599e+06
55 to 59	2000	1.85206e+06	1.23246e+06	2.54044e+06
60 to 64	2000	2.18437e+06	1.42695e+06	3.02793e+06
65 to 69	2000	2.25757e+06	1.4837e+06	3.13908e+06
70 to 74	2000	2.07808e+06	1.31824e+06	2.94825e+06
75 to 79	2000	1.55256e+06	951705	2.24318e+06
<1 year	2000	66615.7	27181	120251
80 to 84	2000	854827	481281	1.30676e+06
85 to 89	2000	461998	242545	723233
90 to 94	2000	163445	78667.5	264499
95 plus	2000	45470.1	21072.8	74969.7
25 to 29	2001	409758	202294	670973
30 to 34	2001	556658	298137	876532
35 to 39	2001	734429	416639	1.10708e+06
40 to 44	2001	950477	552587	1.40239e+06
45 to 49	2001	1.35613e+06	818899	1.9615e+06
50 to 54	2001	1.6843e+06	1.06178e+06	2.37598e+06
55 to 59	2001	1.86508e+06	1.2308e+06	2.53936e+06
60 to 64	2001	2.18003e+06	1.4429e+06	2.98839e+06
65 to 69	2001	2.30076e+06	1.51292e+06	3.17321e+06
70 to 74	2001	2.15253e+06	1.36554e+06	3.03727e+06
75 to 79	2001	1.61947e+06	1.00189e+06	2.30771e+06
<1 year	2001	66123.2	26948.6	118799
80 to 84	2001	901803	515250	1.35449e+06
85 to 89	2001	477516	253468	740771
90 to 94	2001	170700	84065.7	273779
95 plus	2001	48100.3	22465	79063.1
25 to 29	2002	398009	196939	649053
30 to 34	2002	536896	284211	851778
35 to 39	2002	742886	421676	1.11938e+06
40 to 44	2002	960155	555820	1.42042e+06
45 to 49	2002	1.34742e+06	808490	1.93519e+06
50 to 54	2002	1.73163e+06	1.08902e+06	2.43549e+06
55 to 59	2002	1.91326e+06	1.26159e+06	2.61592e+06
60 to 64	2002	2.19754e+06	1.44822e+06	3.03105e+06
65 to 69	2002	2.34623e+06	1.54199e+06	3.26552e+06
70 to 74	2002	2.20868e+06	1.40221e+06	3.12342e+06
75 to 79	2002	1.69066e+06	1.04856e+06	2.41473e+06
<1 year	2002	65746.3	26748.3	118321
80 to 84	2002	953645	545655	1.42396e+06
85 to 89	2002	492428	266651	752975
90 to 94	2002	178683	87903.1	285492
95 plus	2002	51046.6	23867.6	83703
25 to 29	2003	386318	191330	626887
30 to 34	2003	521217	273435	829013
35 to 39	2003	722874	403944	1.10282e+06
40 to 44	2003	973912	556570	1.4446e+06
45 to 49	2003	1.31703e+06	782191	1.91387e+06
50 to 54	2003	1.76862e+06	1.10959e+06	2.47972e+06
55 to 59	2003	1.9462e+06	1.283e+06	2.66763e+06
60 to 64	2003	2.21842e+06	1.47613e+06	3.03242e+06
65 to 69	2003	2.36598e+06	1.55134e+06	3.28655e+06
70 to 74	2003	2.2366e+06	1.42783e+06	3.14645e+06
75 to 79	2003	1.74896e+06	1.09155e+06	2.4903e+06
<1 year	2003	65396.1	26690.4	118616
80 to 84	2003	996842	571595	1.50675e+06
85 to 89	2003	502190	273678	774383
90 to 94	2003	185958	92419.2	297426
95 plus	2003	53638.3	25204.7	87464.9
25 to 29	2004	380436	187008	623802
30 to 34	2004	512516	265798	818170
35 to 39	2004	706768	394384	1.07732e+06
40 to 44	2004	988798	563054	1.47111e+06
45 to 49	2004	1.29307e+06	766663	1.87995e+06
50 to 54	2004	1.77048e+06	1.09445e+06	2.50869e+06
55 to 59	2004	1.96657e+06	1.28122e+06	2.71881e+06
60 to 64	2004	2.19484e+06	1.46784e+06	3.0165e+06
65 to 69	2004	2.32978e+06	1.51304e+06	3.25647e+06
70 to 74	2004	2.23494e+06	1.43162e+06	3.13474e+06
75 to 79	2004	1.79047e+06	1.12755e+06	2.55075e+06
<1 year	2004	65023.3	26304.9	117275
80 to 84	2004	1.03522e+06	596318	1.56339e+06
85 to 89	2004	512617	281165	781023
90 to 94	2004	191581	96421.8	306796
95 plus	2004	55485.1	26184.5	91117.4
25 to 29	2005	376508	183273	616750
30 to 34	2005	496110	255286	795085
35 to 39	2005	700058	388558	1.06198e+06
40 to 44	2005	1.00143e+06	571035	1.48951e+06
45 to 49	2005	1.27792e+06	756402	1.85807e+06
50 to 54	2005	1.8137e+06	1.12556e+06	2.56426e+06
55 to 59	2005	1.99189e+06	1.29709e+06	2.74432e+06
60 to 64	2005	2.18174e+06	1.45478e+06	2.99063e+06
65 to 69	2005	2.33329e+06	1.51678e+06	3.2558e+06
70 to 74	2005	2.26752e+06	1.45935e+06	3.17116e+06
75 to 79	2005	1.85234e+06	1.16642e+06	2.60859e+06
<1 year	2005	64398.6	25817.3	117047
80 to 84	2005	1.08138e+06	623246	1.62069e+06
85 to 89	2005	536654	298024	820007
90 to 94	2005	199142	100990	316607
95 plus	2005	57963.9	27372.3	94971.5
25 to 29	2006	372924	179462	607949
30 to 34	2006	482708	246529	779973
35 to 39	2006	693290	378518	1.05807e+06
40 to 44	2006	1.02283e+06	579756	1.51669e+06
45 to 49	2006	1.26475e+06	744114	1.83998e+06
50 to 54	2006	1.80202e+06	1.12002e+06	2.54052e+06
55 to 59	2006	2.04219e+06	1.32514e+06	2.82628e+06
60 to 64	2006	2.20447e+06	1.47841e+06	2.98758e+06
65 to 69	2006	2.31802e+06	1.51206e+06	3.22012e+06
70 to 74	2006	2.28156e+06	1.48684e+06	3.16755e+06
75 to 79	2006	1.88578e+06	1.20047e+06	2.6423e+06
<1 year	2006	63424.2	25754.4	114992
80 to 84	2006	1.10964e+06	645276	1.64716e+06
85 to 89	2006	559274	313334	844731
90 to 94	2006	203297	104140	323198
95 plus	2006	60180.2	28395	98872.1
25 to 29	2007	368558	176408	605748
30 to 34	2007	471766	238379	761919
35 to 39	2007	680920	369202	1.04413e+06
40 to 44	2007	1.04134e+06	593441	1.53768e+06
45 to 49	2007	1.27371e+06	757307	1.83823e+06
50 to 54	2007	1.80752e+06	1.11632e+06	2.54633e+06
55 to 59	2007	2.07177e+06	1.32247e+06	2.8533e+06
60 to 64	2007	2.27636e+06	1.52203e+06	3.07914e+06
65 to 69	2007	2.29945e+06	1.50269e+06	3.18656e+06
70 to 74	2007	2.29304e+06	1.48763e+06	3.19122e+06
75 to 79	2007	1.9156e+06	1.22594e+06	2.67999e+06
<1 year	2007	62187.4	25151.9	112260
80 to 84	2007	1.14729e+06	670197	1.69467e+06
85 to 89	2007	589002	333330	895316
90 to 94	2007	208614	107933	329032
95 plus	2007	62805.6	29818.5	103350
25 to 29	2008	367525	173982	605807
30 to 34	2008	464514	231927	760384
35 to 39	2008	671464	362596	1.03382e+06
40 to 44	2008	1.03506e+06	581843	1.54217e+06
45 to 49	2008	1.30727e+06	767992	1.90209e+06
50 to 54	2008	1.79222e+06	1.10609e+06	2.54589e+06
55 to 59	2008	2.10237e+06	1.35652e+06	2.90938e+06
60 to 64	2008	2.34069e+06	1.56583e+06	3.16623e+06
65 to 69	2008	2.31426e+06	1.52496e+06	3.1857e+06
70 to 74	2008	2.31948e+06	1.49843e+06	3.21925e+06
75 to 79	2008	1.97012e+06	1.25857e+06	2.75829e+06
<1 year	2008	60783.5	24389.9	110173
80 to 84	2008	1.20441e+06	706107	1.79188e+06
85 to 89	2008	627205	353264	951970
90 to 94	2008	215798	113021	337796
95 plus	2008	66042.9	31479.3	108398
25 to 29	2009	368003	173796	611650
30 to 34	2009	452756	221267	745786
35 to 39	2009	648698	344373	1.00789e+06
40 to 44	2009	992758	549610	1.48344e+06
45 to 49	2009	1.34978e+06	791471	1.94411e+06
50 to 54	2009	1.74229e+06	1.07007e+06	2.44635e+06
55 to 59	2009	2.12182e+06	1.35707e+06	2.91865e+06
60 to 64	2009	2.39371e+06	1.59981e+06	3.2335e+06
65 to 69	2009	2.34547e+06	1.56142e+06	3.21249e+06
70 to 74	2009	2.31825e+06	1.5179e+06	3.2314e+06
75 to 79	2009	1.99948e+06	1.29055e+06	2.78224e+06
<1 year	2009	59278.5	23643.8	107219
80 to 84	2009	1.24608e+06	722823	1.8537e+06
85 to 89	2009	660548	370177	997047
90 to 94	2009	222454	117220	348500
95 plus	2009	68964.1	33250.8	113420
25 to 29	2010	368487	171390	610219
30 to 34	2010	442615	213322	735754
35 to 39	2010	628557	325337	980901
40 to 44	2010	967845	530731	1.45433e+06
45 to 49	2010	1.3904e+06	805961	2.01122e+06
50 to 54	2010	1.72474e+06	1.03846e+06	2.44458e+06
55 to 59	2010	2.19857e+06	1.39706e+06	3.03033e+06
60 to 64	2010	2.42482e+06	1.60044e+06	3.28951e+06
65 to 69	2010	2.39424e+06	1.58681e+06	3.26732e+06
70 to 74	2010	2.32942e+06	1.50277e+06	3.22409e+06
75 to 79	2010	2.02904e+06	1.30995e+06	2.82726e+06
<1 year	2010	57848.8	22735.8	105536
80 to 84	2010	1.29565e+06	763358	1.91499e+06
85 to 89	2010	693723	392864	1.04872e+06
90 to 94	2010	233800	122872	366197
95 plus	2010	72615.1	35126.4	119001
25 to 29	2011	363364	167468	604069
30 to 34	2011	433610	207030	721664
35 to 39	2011	605556	311869	963322
40 to 44	2011	946472	517626	1.44021e+06
45 to 49	2011	1.40816e+06	816897	2.04275e+06
50 to 54	2011	1.72382e+06	1.04708e+06	2.43549e+06
55 to 59	2011	2.21987e+06	1.42379e+06	3.07021e+06
60 to 64	2011	2.52107e+06	1.66668e+06	3.43597e+06
65 to 69	2011	2.42537e+06	1.61346e+06	3.31542e+06
70 to 74	2011	2.33801e+06	1.51532e+06	3.24804e+06
75 to 79	2011	2.06701e+06	1.33374e+06	2.87417e+06
<1 year	2011	56369.8	22309	102761
80 to 84	2011	1.3321e+06	790881	1.97623e+06
85 to 89	2011	724062	413706	1.09938e+06
90 to 94	2011	247767	130875	388579
95 plus	2011	75517.5	36481	123839
25 to 29	2012	354463	163236	590990
30 to 34	2012	423058	200795	706598
35 to 39	2012	579854	296598	918784
40 to 44	2012	921980	497043	1.40456e+06
45 to 49	2012	1.41302e+06	819383	2.05895e+06
50 to 54	2012	1.7386e+06	1.04731e+06	2.46655e+06
55 to 59	2012	2.24144e+06	1.42091e+06	3.09578e+06
60 to 64	2012	2.58876e+06	1.71918e+06	3.53048e+06
65 to 69	2012	2.45449e+06	1.63679e+06	3.35208e+06
70 to 74	2012	2.34774e+06	1.54295e+06	3.26256e+06
75 to 79	2012	2.09698e+06	1.35791e+06	2.92478e+06
<1 year	2012	54849.1	21667.3	99816.4
80 to 84	2012	1.35812e+06	805852	2.01631e+06
85 to 89	2012	755644	431875	1.14349e+06
90 to 94	2012	261629	138349	411241
95 plus	2012	78067.1	38133.3	128332
25 to 29	2013	347879	159256	580966
30 to 34	2013	414806	191952	694239
35 to 39	2013	561340	281279	900898
40 to 44	2013	896680	474216	1.38278e+06
45 to 49	2013	1.39003e+06	800259	2.03186e+06
50 to 54	2013	1.77801e+06	1.06334e+06	2.53219e+06
55 to 59	2013	2.19791e+06	1.38175e+06	3.04099e+06
60 to 64	2013	2.59057e+06	1.69227e+06	3.53312e+06
65 to 69	2013	2.44092e+06	1.60531e+06	3.3327e+06
70 to 74	2013	2.33002e+06	1.52502e+06	3.20045e+06
75 to 79	2013	2.13582e+06	1.38403e+06	2.95742e+06
<1 year	2013	53332.4	21082	97797.1
80 to 84	2013	1.43426e+06	848425	2.10789e+06
85 to 89	2013	809411	463041	1.21327e+06
90 to 94	2013	281047	148081	439634
95 plus	2013	81979.6	40835.9	133821
25 to 29	2014	338281	155002	566578
30 to 34	2014	404744	184719	681241
35 to 39	2014	538861	263409	874984
40 to 44	2014	859537	449222	1.33018e+06
45 to 49	2014	1.32359e+06	748755	1.95384e+06
50 to 54	2014	1.82091e+06	1.10002e+06	2.59504e+06
55 to 59	2014	2.16735e+06	1.35567e+06	3.0203e+06
60 to 64	2014	2.59868e+06	1.69473e+06	3.58336e+06
65 to 69	2014	2.45572e+06	1.60452e+06	3.39109e+06
70 to 74	2014	2.28318e+06	1.49484e+06	3.17493e+06
75 to 79	2014	2.15243e+06	1.39567e+06	3.01144e+06
<1 year	2014	51707.1	20242	95422.9
80 to 84	2014	1.51485e+06	903765	2.23564e+06
85 to 89	2014	848594	486698	1.26707e+06
90 to 94	2014	296385	157914	466652
95 plus	2014	85833.4	42415.6	140424
25 to 29	2015	330650	149975	556148
30 to 34	2015	397175	180755	672455
35 to 39	2015	522651	252133	857611
40 to 44	2015	817764	416591	1.28086e+06
45 to 49	2015	1.29137e+06	711564	1.92261e+06
50 to 54	2015	1.86349e+06	1.10845e+06	2.65938e+06
55 to 59	2015	2.20402e+06	1.37957e+06	3.0892e+06
60 to 64	2015	2.70624e+06	1.75036e+06	3.73503e+06
65 to 69	2015	2.50831e+06	1.64123e+06	3.45067e+06
70 to 74	2015	2.29619e+06	1.50265e+06	3.17903e+06
75 to 79	2015	2.159e+06	1.39162e+06	3.00842e+06
<1 year	2015	50081.9	19396.8	92382.8
80 to 84	2015	1.53629e+06	921804	2.25065e+06
85 to 89	2015	874394	503187	1.30918e+06
90 to 94	2015	309619	164124	487499
95 plus	2015	90271.5	44570.5	148456
25 to 29	2016	324969	146716	549690
30 to 34	2016	392728	175734	669727
35 to 39	2016	510530	241653	842797
40 to 44	2016	793825	400817	1.25804e+06
45 to 49	2016	1.26262e+06	706112	1.90296e+06
50 to 54	2016	1.84984e+06	1.10328e+06	2.65031e+06
55 to 59	2016	2.20246e+06	1.38696e+06	3.11028e+06
60 to 64	2016	2.69959e+06	1.76883e+06	3.73267e+06
65 to 69	2016	2.60706e+06	1.70871e+06	3.56813e+06
70 to 74	2016	2.35945e+06	1.54422e+06	3.25748e+06
75 to 79	2016	2.16562e+06	1.38539e+06	3.03648e+06
<1 year	2016	48256	18514.8	89373.5
80 to 84	2016	1.56483e+06	933272	2.29818e+06
85 to 89	2016	902155	516875	1.35701e+06
90 to 94	2016	323446	172700	506925
95 plus	2016	95364.5	46903.1	156951
25 to 29	2017	320671	145278	544448
30 to 34	2017	389551	173487	662470
35 to 39	2017	504046	234252	833663
40 to 44	2017	772253	382438	1.2286e+06
45 to 49	2017	1.21879e+06	656397	1.83881e+06
50 to 54	2017	1.82819e+06	1.06404e+06	2.64685e+06
55 to 59	2017	2.18878e+06	1.34864e+06	3.09921e+06
60 to 64	2017	2.6568e+06	1.70978e+06	3.67873e+06
65 to 69	2017	2.65339e+06	1.72963e+06	3.68447e+06
70 to 74	2017	2.43152e+06	1.59292e+06	3.36722e+06
75 to 79	2017	2.17375e+06	1.39976e+06	3.04785e+06
<1 year	2017	46428.9	17568	86597.7
80 to 84	2017	1.6065e+06	962297	2.34931e+06
85 to 89	2017	928698	537605	1.402e+06
90 to 94	2017	340034	181590	534568
95 plus	2017	101212	50024.7	165964
25 to 29	2018	317863	142641	538436
30 to 34	2018	386738	169395	664831
35 to 39	2018	500443	229839	836221
40 to 44	2018	743455	363797	1.19721e+06
45 to 49	2018	1.16923e+06	623186	1.79999e+06
50 to 54	2018	1.80447e+06	1.05402e+06	2.63833e+06
55 to 59	2018	2.17604e+06	1.34152e+06	3.10141e+06
60 to 64	2018	2.61153e+06	1.66699e+06	3.61639e+06
65 to 69	2018	2.70264e+06	1.7577e+06	3.74582e+06
70 to 74	2018	2.48253e+06	1.62445e+06	3.45285e+06
75 to 79	2018	2.19405e+06	1.42477e+06	3.097e+06
<1 year	2018	44995.4	17105.1	83816.7
80 to 84	2018	1.64645e+06	989631	2.43883e+06
85 to 89	2018	967061	560654	1.43846e+06
90 to 94	2018	363977	196959	569273
95 plus	2018	108009	53592.6	177039
25 to 29	2019	314186	140787	527263
30 to 34	2019	381830	166703	658423
35 to 39	2019	492774	225058	830470
40 to 44	2019	716950	342340	1.17065e+06
45 to 49	2019	1.1269e+06	584497	1.73932e+06
50 to 54	2019	1.76475e+06	1.00863e+06	2.59235e+06
55 to 59	2019	2.1903e+06	1.33324e+06	3.10915e+06
60 to 64	2019	2.57347e+06	1.60994e+06	3.57513e+06
65 to 69	2019	2.75013e+06	1.75451e+06	3.84277e+06
70 to 74	2019	2.57157e+06	1.66198e+06	3.60332e+06
75 to 79	2019	2.20508e+06	1.41661e+06	3.09249e+06
<1 year	2019	44155.5	16740.6	82560.2
80 to 84	2019	1.66016e+06	986260	2.43579e+06
85 to 89	2019	1.0037e+06	581334	1.49802e+06
90 to 94	2019	387653	207867	601422
95 plus	2019	114693	56781	187170
